# Supplementary material for: Postovulatory maternal transcriptome in Atlantic salmon and its relation to developmental potential of embryos
Source: PubMed Central journal article supplement (PMC6480738; doi:10.1186/s12864-019-5667-4), 2019-04-24

# Cluster 1

au bp

edge #

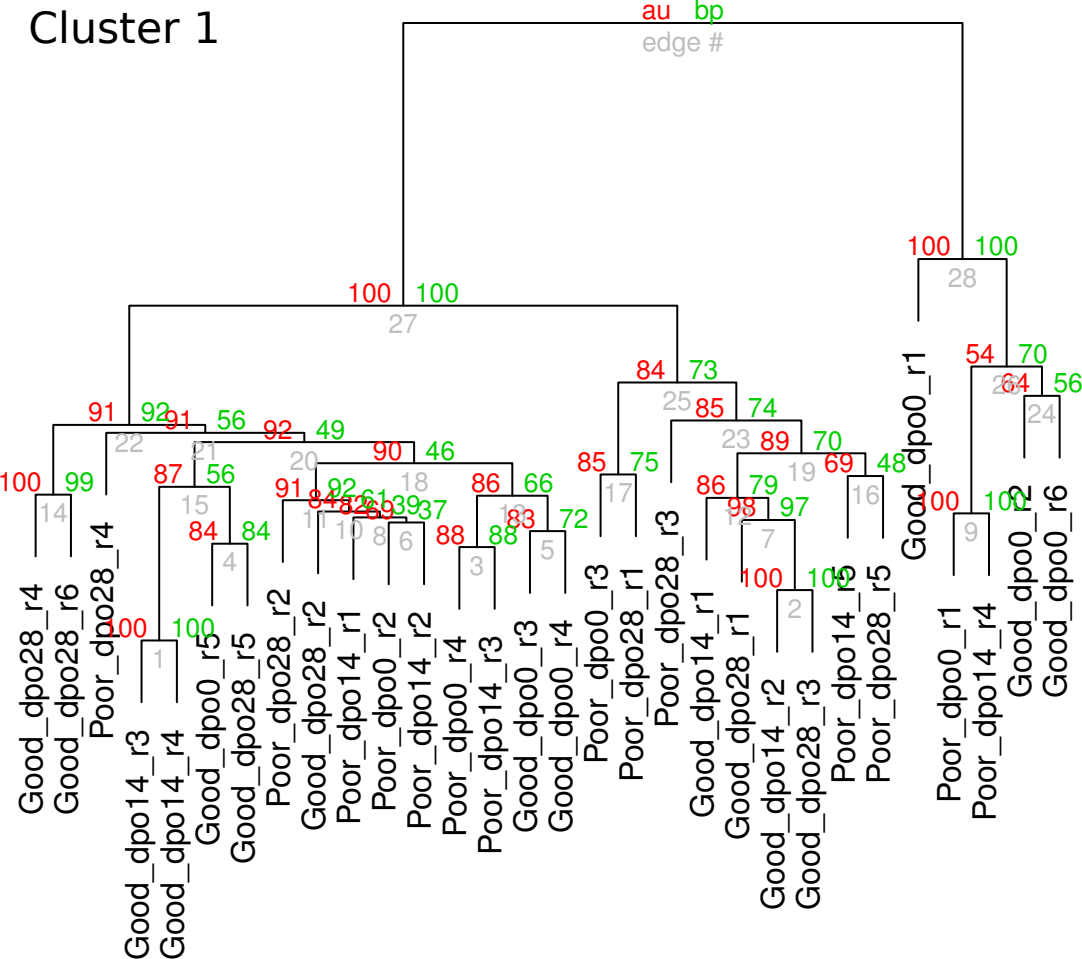

# Cluster 2

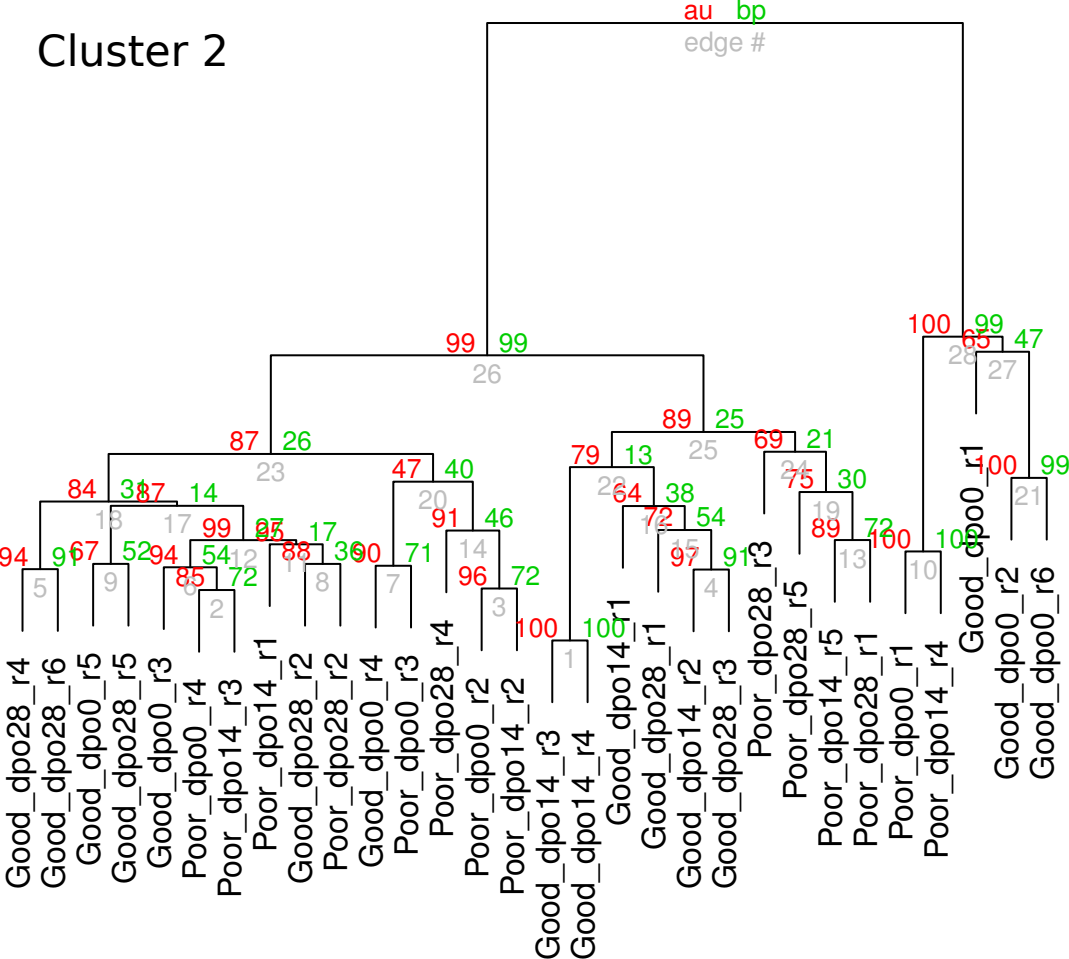

au bp

# Cluster 3

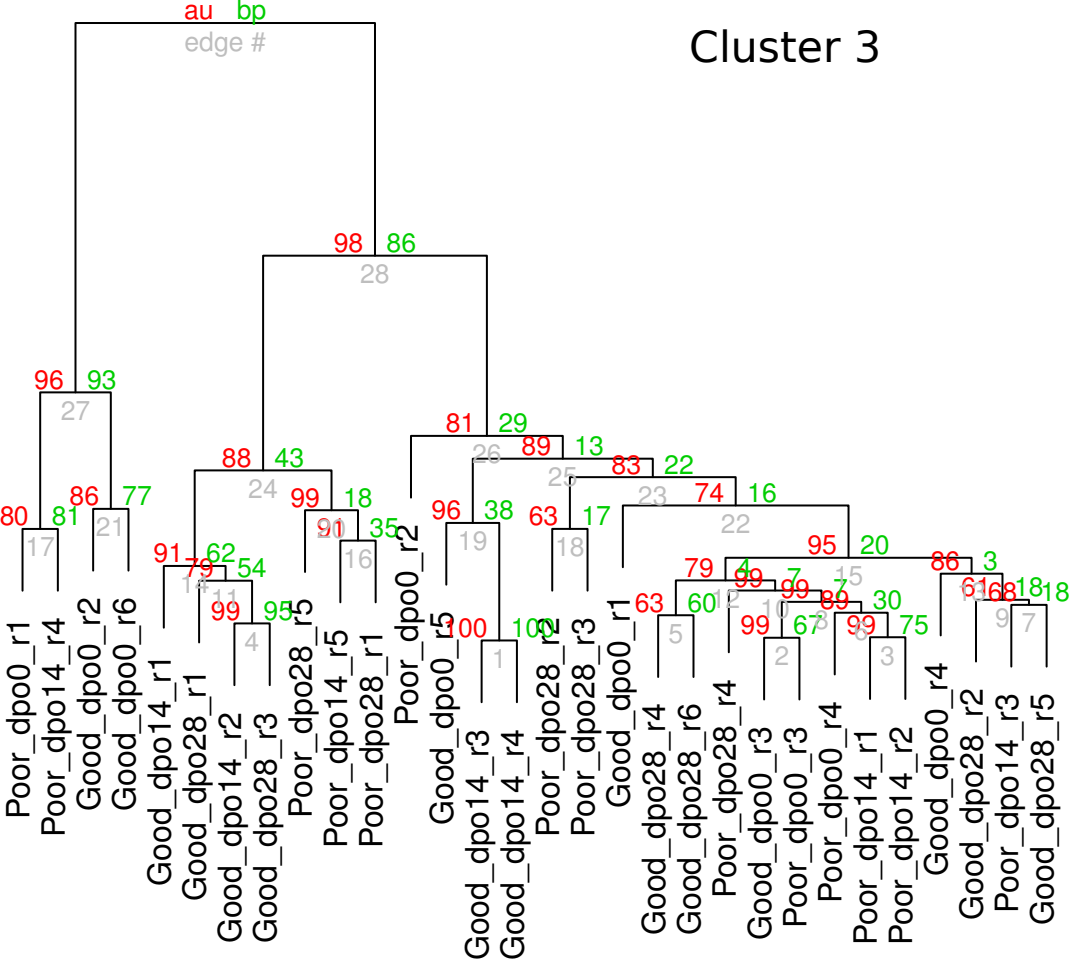

# Cluster 4

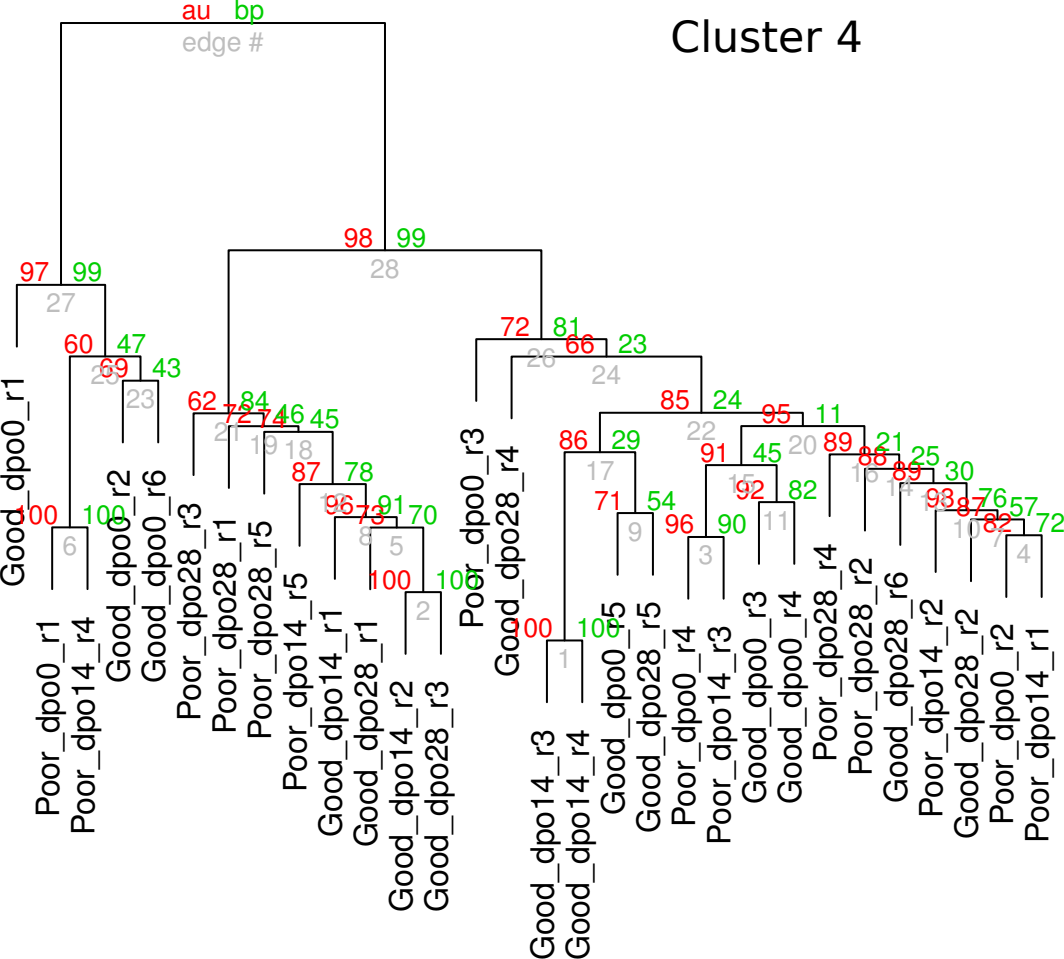

# Cluster 5

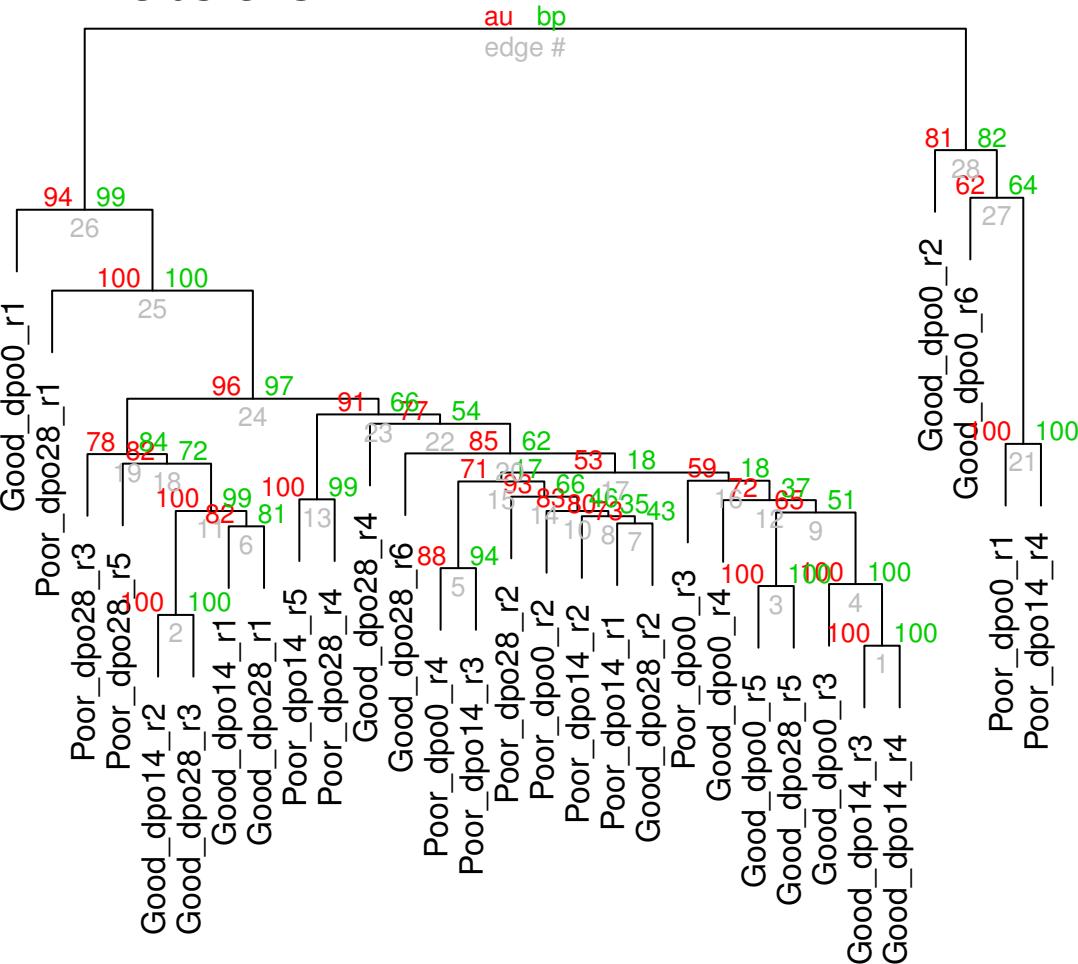

# Cluster 6

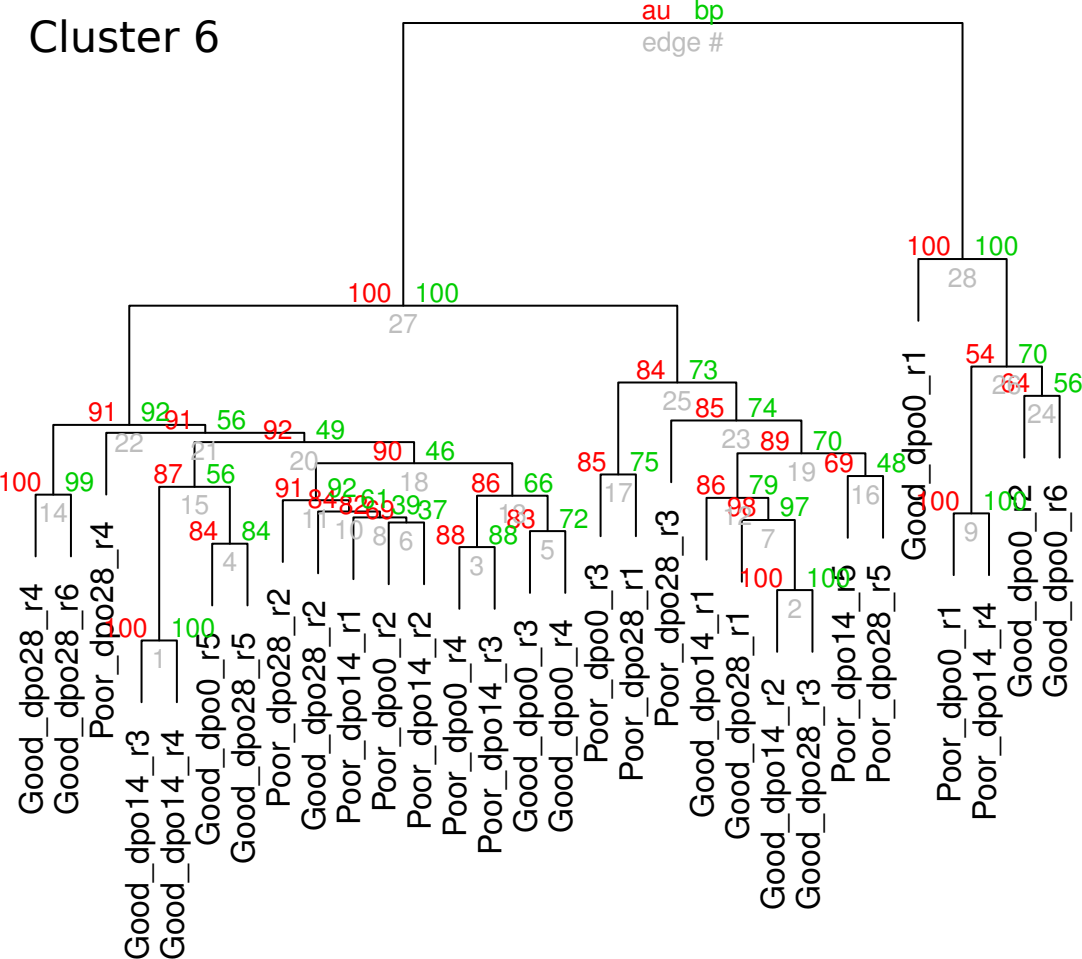

Supplement: 12864_2019_5667_MOESM5_ESM.pdf [file 12864_2019_5667_MOESM5_ESM.pdf]
