# Supplementary material for: Postovulatory maternal transcriptome in Atlantic salmon and its relation to developmental potential of embryos
Source: PubMed Central journal article supplement (PMC6480738; doi:10.1186/s12864-019-5667-4), 2019-04-24
Supplement: 12864_2019_5667_MOESM6_ESM.pdf [file 12864_2019_5667_MOESM6_ESM.pdf]

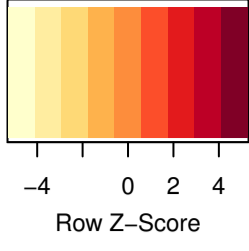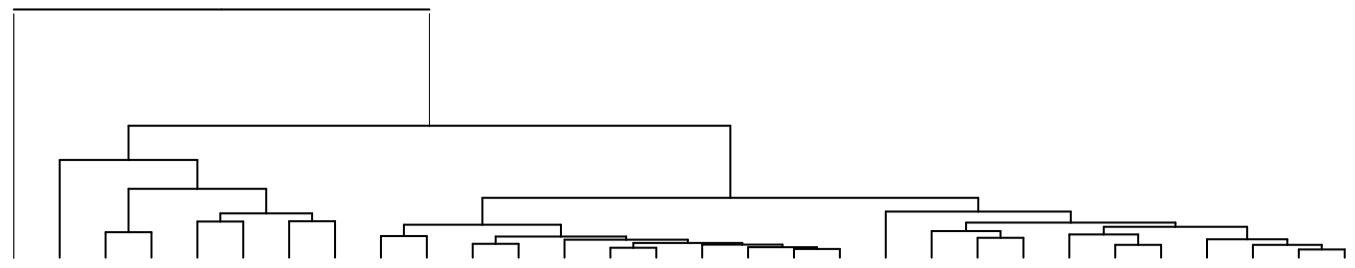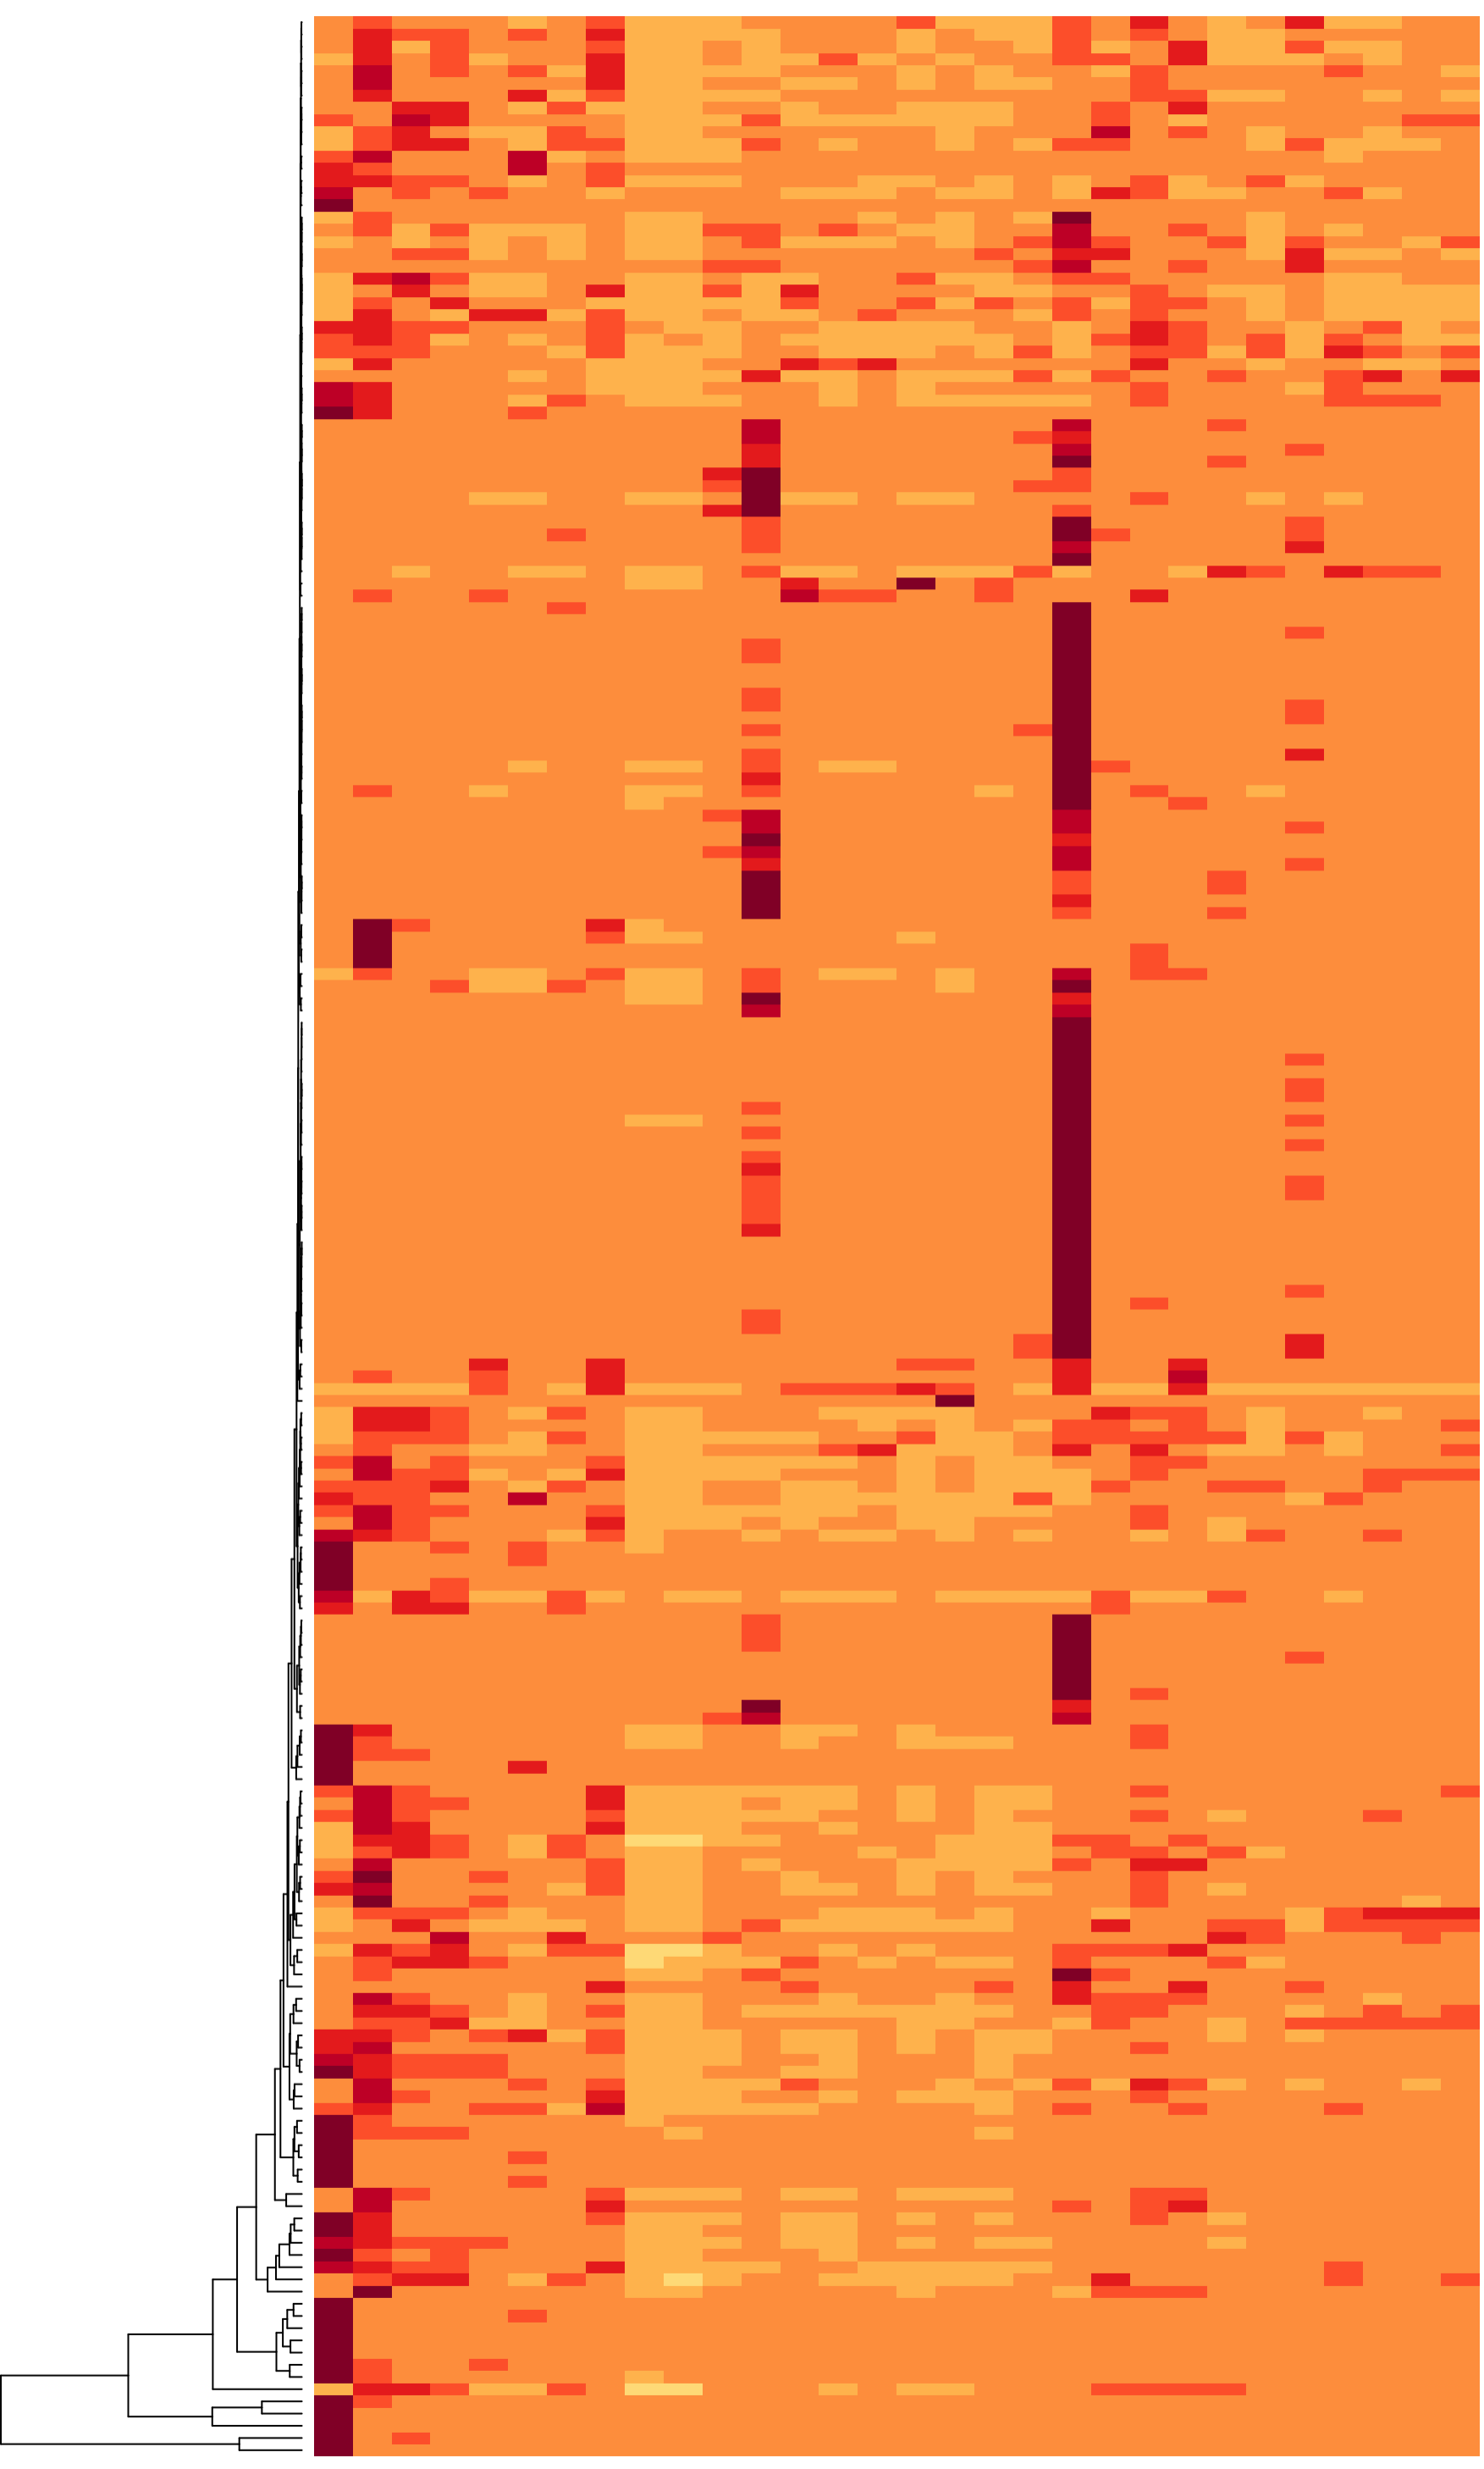

Poor.0dpo.3  
 Poor.0dpo.4  
 Good.14dpo.1  
 Poor.14dpo.1  
 Poor.14dpo.2  
 Good.0dpo.3  
 Good.28dpo.5  
 Poor.0dpo.2  
 Good.0dpo.1  
 Good.0dpo.2  
 Poor.28dpo.5  
 Poor.28dpo.2  
 Poor.14dpo.3  
 Good.28dpo.6  
 Good.14dpo.2  
 Poor.28dpo.4  
 Good.0dpo.6  
 Poor.28dpo.1  
 Poor.28dpo.3  
 Good.28dpo.3  
 Good.28dpo.2  
 Good.14dpo.4  
 Good.14dpo.3  
 Good.28dpo.1  
 Good.0dpo.5  
 Good.28dpo.4  
 Poor.0dpo.1  
 Good.0dpo.4  
 Poor.14dpo.4  
 Poor.14dpo.5

rna67149  
 rna70752  
 XM\_014149593.1  
 XM\_014146745.1  
 XM\_014136275.1  
 XM\_014158219.1  
 XM\_014146624.1  
 XM\_014163657.1  
 XM\_014132185.1  
 XM\_014158923.1  
 XM\_014145956.1  
 XM\_014208635.1  
 rna16279  
 rna21147  
 NM\_001141150.1  
 XM\_014162408.1  
 XM\_014163690.1  
 XM\_014149914.1  
 XM\_014130879.1  
 XM\_014193877.1  
 XM\_014137531.1  
 XM\_014137595.1  
 XM\_014142155.1  
 XM\_014150221.1  
 XM\_014127726.1  
 XM\_014186368.1  
 XM\_014156572.1  
 XM\_014201907.1  
 XM\_014208654.1  
 XM\_014160287.1  
 XM\_014149438.1  
 rna29303  
 XM\_014145343.1  
 XM\_014156674.1  
 XM\_014209799.1  
 XM\_014158712.1  
 NM\_001140380.1  
 NM\_001279124.1  
 XM\_014198764.1  
 XM\_014165659.1  
 gene26468  
 XM\_014183112.1  
 NM\_001139800.1  
 XM\_014176742.1  
 XM\_014164248.1  
 XM\_014126671.1  
 XM\_014206991.1  
 XM\_014204314.1  
 XM\_014180756.1  
 XM\_014199673.1  
 XM\_014182714.1  
 NM\_001141791.1  
 XM\_014158911.1  
 NM\_001279112.1  
 XM\_014142102.1  
 XM\_014133282.1  
 XM\_014206630.1  
 NM\_001173900.1  
 XM\_014196390.1  
 XM\_014129642.1  
 NM\_001173900.1  
 rna85074  
 NM\_001140576.1  
 XM\_014215796.1  
 XM\_014188167.1  
 XM\_014155220.1  
 NM\_001140451.1  
 rna55477  
 XM\_014161399.1  
 XM\_014192825.1  
 XM\_014157806.1  
 NM\_001140089.1  
 XM\_014209413.1  
 XM\_014167170.1  
 XM\_014175254.1  
 XM\_014145436.1  
 XM\_014125405.1  
 XM\_014156747.1  
 NM\_001139913.1  
 XM\_014173846.1  
 XM\_014139892.1  
 rna6471  
 XM\_014216213.1  
 XM\_014190053.1  
 XM\_014198502.1  
 XM\_014124361.1  
 XM\_014194161.1  
 XM\_014164761.1  
 XM\_014212490.1  
 XM\_014140845.1  
 XM\_014187528.1  
 XM\_014156889.1  
 XM\_014206628.1  
 XM\_014132560.1  
 XM\_014212572.1  
 NM\_001165385.1  
 XM\_014200821.1  
 rna11799  
 XM\_014175897.1  
 XM\_014162065.1  
 NM\_001141779.1  
 XM\_014133066.1  
 XM\_014133067.1  
 XM\_014187510.1  
 XM\_014148887.1  
 NM\_001140215.1  
 XM\_014167975.1  
 XM\_014129493.1  
 XM\_014155590.1  
 XM\_014201580.1  
 XM\_014159237.1  
 XM\_014145338.1  
 NM\_001140849.1  
 rna43405  
 XM\_014127153.1  
 XM\_014207424.1  
 XM\_014126526.1  
 XM\_014168000.1  
 XM\_014131372.1  
 rna4714  
 XM\_014193676.1  
 rnaT04920  
 rna25307  
 XM\_014128645.1  
 gene16140  
 rna78157  
 XM\_014133759.1  
 rnaT5692  
 XM\_014215032.1  
 rna48789  
 XM\_014212117.1  
 rna67038  
 rna41984  
 XM\_014156544.1  
 XM\_014213290.1  
 NM\_001165324.1  
 NM\_001141727.1  
 XM\_014198569.1  
 NM\_001145422.1  
 NM\_001123579.1  
 NM\_001146524.1  
 XM\_014153193.1  
 XM\_014129975.1  
 XM\_014168286.1  
 XM\_014131639.1  
 XM\_014211237.1  
 XM\_014148374.1  
 XM\_014128669.1  
 XM\_014188788.1  
 XM\_014194058.1  
 XM\_014171555.1  
 XM\_014126507.1  
 XM\_014130214.1  
 rna48190  
 XM\_014183614.1  
 XM\_014177446.1  
 gene35807  
 XM\_014159798.1  
 XM\_014176726.1  
 NM\_001141552.2  
 XM\_014210715.1  
 XM\_014182909.1  
 XM\_014134027.1  
 XM\_014173824.1  
 XM\_014142650.1  
 NM\_001140296.1  
 XM\_014200814.1  
 XM\_014146999.1  
 XM\_014198790.1  
 XM\_014151875.1  
 XM\_014164764.1  
 XM\_014169800.1  
 XM\_014185646.1  
 XM\_014125913.1  
 XM\_014130886.1  
 rna40633  
 gene49071  
 rna111961  
 XM\_014176875.1  
 gene10405  
 XM\_014131878.1  
 rnaT33450  
 NM\_001146673.1  
 XM\_014189124.1  
 XM\_014127362.1  
 XM\_014203945.1  
 XM\_014206922.1  
 XM\_014125981.1  
 rnaT33442  
 XM\_014184761.1  
 rna75715  
 rna72563  
 XM\_014134197.1  
 XM\_014141287.1  
 XM\_014210704.1  
 rnaT33455  
 XM\_014127608.1  
 rnaT33458  
 XM\_014140827.1  
 rnaT33460
