# Supplementary material for: Postovulatory maternal transcriptome in Atlantic salmon and its relation to developmental potential of embryos
Source: BMC Genomics. 2019 Apr 24;20:315. doi: 10.1186/s12864-019-5667-4 (PMC6480738; doi:10.1186/s12864-019-5667-4)
Supplement: Supplementary file 3 — Differentially accumulated transcripts from Atlantic salmon eggs and their annotation. (XLS 119 kb) [file 12864_2019_5667_MOESM3_ESM.xls]

## Sheet: Sheet1
Additional file 3. Differentially accumulated transcripts from Atlantic salmon eggs and their annotation
	log2FC	P-adj	gene ID	gene name	Good_0dpo	Low_0dpo	Good_14dpo	Low_14dpo	Good_28dpo	Low_28dpo	GO term	GO ID
Good versus poor 28 dpo
RNA22499	-6.41211	0.00804974	NM_001140849.1	Hepcidin-1	10.8333	24.75	32.25	18.8	24.8333	23.2	CCFFFFPPPP	GO:0005576;GO:0005623;GO:0001530;GO:0005179;GO:0042834;GO:0070891;GO:0006879;GO:0008285;GO:0050829;GO:0050830
gene35807	2.36479	0.00804974	NA	NA	51.8333	61.5	67.5	72	65.5	62.6	#N/A	#N/A
Good_vs_poor_14dpo
RNA124258	-2.32837	0.00569339	XM_014183614.1	bromodomain-containing protein 4-like	35.3333	121	75.5	54.6	37.8333	27	#N/A	#N/A
RNA22499	-8.61021	0.00569339	NM_001140849.1	Hepcidin-1	10.8333	24.75	32.25	18.8	24.8333	23.2	CCFFFFPPPP	GO:0005576;GO:0005623;GO:0001530;GO:0005179;GO:0042834;GO:0070891;GO:0006879;GO:0008285;GO:0050829;GO:0050830
RNA49338	2.24251	0.0108175	XM_014132185.1	stathmin-3-like	4.66667	10.25	9	11	8.16667	5.6	#N/A	#N/A
RNA34935	7.57529	0.0234593	XM_014212117.1	reticulon-4 receptor-like 2	1.5	35.25	29.5	36.8	26.6667	8.6	#N/A	#N/A
Good versus poor 0 dpo
RNA22499	-8.49457	0.00282535	NM_001140849.1	Hepcidin-1	10.8333	24.75	32.25	18.8	24.8333	23.2	CCFFFFPPPP	GO:0005576;GO:0005623;GO:0001530;GO:0005179;GO:0042834;GO:0070891;GO:0006879;GO:0008285;GO:0050829;GO:0050830
RNA43405	-4.0582	0.0312274	NA	NA	44	10.5	5	5.2	3.33333	2.2	#N/A	#N/A
RNA44995	-5.70629	0.0322718	XM_014127726.1	serine incorporator 4-like	2	3.5	3	1.6	2.16667	1.2	C	GO:0016021
RNA6614	-2.96084	0.0322718	XM_014146624.1	pollen-specific leucine-rich repeat extensin-like protein 1	9	20	15	5.8	5	4.4	#N/A	#N/A
gene10405	-3.81075	0.0322718	NA	NA	31.8333	435.25	424.5	26.4	168.167	12.6	#N/A	#N/A
Good 28 dpo versus 0 dpo
RNA67038	6.96699	1.13633e-05	NA	NA	0.5	1	1.25	1.4	107.833	39	#N/A	#N/A
RNA41984	7.40189	0.000973998	NA	NA	0	1.75	1.75	0.8	104.667	33.2	#N/A	#N/A
RNA36163	8.06435	0.000973998	XM_014213290.1	neuroblast differentiation-associated protein AHNAK-like	0.333333	1	14.25	1.2	105.167	20	#N/A	#N/A
RNA80433	8.08282	0.00149847	XM_014161399.1	L-serine dehydratase/L-threonine deaminase-like	0	0	0.25	0.4	19.1667	24.8	CFFFFFFPPPP	GO:0005739;GO:0003941;GO:0004672;GO:0004794;GO:0005524;GO:0030170;GO:0042803;GO:0006094;GO:0006468;GO:0006565;GO:0042866
RNA47438	-2.3626	0.00149847	XM_014129975.1	gastrula zinc finger protein XlCGF17.1-like	31	177	62.25	45.4	28.3333	15.4	#N/A	#N/A
RNA6471	8.2907	0.00162487	NA	NA	0.166667	0.25	0	0.2	24.5	28.6	#N/A	#N/A
RNA55477	7.8415	0.00242844	NA	NA	0.166667	0	0.5	0	13.5	22	#N/A	#N/A
RNA107188	6.26403	0.00242844	NM_001173900.1	complement component 1 q subcomponent B chain	0	0	0	0.2	17	6.8	#N/A	#N/A
RNA22786	7.22701	0.0047146	XM_014200821.1	cathepsin S-like	0	0.25	1	0.8	28.3333	13.4	#N/A	#N/A
RNA49703	-1.53667	0.0047146	XM_014131878.1	G0/G1 switch protein 2-like	224.167	860.25	342.5	249	188.667	119.6	#N/A	#N/A
RNA131588	5.6494	0.0047146	XM_014183112.1	complement C1q subcomponent subunit C-like	0	0	0	0	10.3333	5	CCP	GO:0005576;GO:0005581;GO:0006958
RNA86588	7.74239	0.00531648	XM_014167170.1	G protein-coupled receptor 84	0.5	0.75	0.75	0.4	6.16667	19.4	CFPPP	GO:0005887;GO:0008528;GO:0007200;GO:0007218;GO:0032496
RNA8744	7.68941	0.00735805	NM_001123579.1	C type lectin receptor A	1	0	0.25	1.8	47.6667	49	#N/A	0
RNA81434	7.31985	0.00735805	XM_014162065.1	tristetraprolin-like	0.166667	0	0.5	0.2	21.8333	14.6	#N/A	#N/A
RNA36617	7.30403	0.00841699	NM_001140451.1	Butyrate response factor 1	0	0.25	0.75	0.2	16.3333	15.8	CFFP	GO:0005829;GO:0003730;GO:0046872;GO:0061158
RNA7742	7.1451	0.00841699	XM_014157806.1	carcinoembryonic antigen-related cell adhesion molecule 20-like	0.5	0	0	0.2	6.5	11.6	#N/A	#N/A
RNA22778	-1.32369	0.00841699	XM_014200814.1	protein S100-A1	93.6667	323.5	153.75	130.8	73.6667	49	#N/A	#N/A
gene16140	-2.31352	0.0131294	NA	NA	50.3333	109	34	38.4	18.3333	24	#N/A	#N/A
RNA59365	-1.66547	0.013564	XM_014141287.1	cathepsin Z-like	213	1069.25	406.5	305.6	268.667	175.6	#N/A	#N/A
RNA4387	-2.01451	0.013564	XM_014125913.1	NADH dehydrogenase [ubiquinone] 1 alpha subcomplex subunit 8-like	86.3333	382	130.5	144.8	76.1667	38.4	CCFFPP	GO:0005747;GO:0005758;GO:0008137;GO:0032403;GO:0006810;GO:0055114
RNA43166	-2.21896	0.013564	XM_014125981.1	WASP homolog-associated protein with actin membranes and microtubules-like	190.833	1126.5	261.25	251	207	137.8	FPP	GO:0008092;GO:0016043;GO:0044763
RNA58935	-2.56898	0.013564	XM_014140827.1	phospholipid hydroperoxide glutathione peroxidase mitochondrial	1129.67	6350.5	1845.5	1790.6	1261.83	494.8	#N/A	#N/A
RNA19189	7.03558	0.0141455	NM_001140089.1	v-ets erythroblastosis virus E26 oncogene homolog 2 (avian)	0.166667	0	0.25	0.6	5.33333	12	CFFPPPPP	GO:0005634;GO:0000977;GO:0000981;GO:0001569;GO:0006357;GO:0007369;GO:0030154;GO:0060982
RNA7517	7.12727	0.0141455	XM_014155590.1	apolipoprotein Eb-like	0	0.25	6.5	0.8	56.8333	12.4	#N/A	#N/A
RNA28925	5.978	0.014966	NM_001165385.1	Macrosialin	0.166667	0	5.25	0.2	34.1667	15	C	GO:0016021
RNA46021	-1.2362	0.0159817	XM_014128669.1	fatty acid binding protein 1 liver	51.8333	174.75	96.75	64.6	42.8333	24.8	CCCFFFFPPPPPPPP	GO:0005654;GO:0005737;GO:0070062;GO:0003682;GO:0005215;GO:0008289;GO:0016209;GO:0002230;GO:0006810;GO:0043154;GO:0070301;GO:0071456;GO:0098779;GO:0098792;GO:0098869
RNA29072	4.49609	0.0164802	XM_014206628.1	ependymin-like	0.5	0.75	1.75	0.6	41.1667	4.8	#N/A	#N/A
RNA91789	1.2722	0.0170474	XM_014171555.1	solute carrier family 2 (facilitated glucose transporter) member 8 transcript variant X1	24.5	75	105	86	86.1667	55.8	CFFPPP	GO:0005887;GO:0005351;GO:0005355;GO:0015992;GO:0046323;GO:1904659
RNA54934	3.25266	0.0185095	NM_001145422.1	neutrophil cytosolic factor 1	10.1667	16.5	16.75	18.4	54.1667	76.8	CCFFFFPPPPPP	GO:0005829;GO:0043020;GO:0016175;GO:0016176;GO:0035091;GO:0043325;GO:0006801;GO:0043434;GO:0045730;GO:0050832;GO:0055114;GO:0071222
RNA35429	6.06889	0.0185095	XM_014212572.1	dual specificity protein phosphatase 1-like	0.333333	0.25	0.75	0	28.6667	15.4	#N/A	#N/A
RNA47230	-1.27153	0.0185095	NM_001146524.1	ubiquitin-fold modifier 1	41.6667	159.25	72.75	51.6	43.8333	29	CCCPPP	GO:0005634;GO:0005737;GO:0070062;GO:0033146;GO:0034976;GO:1990592
RNA5404	-1.40682	0.0185095	NM_001146673.1	Intracellular hyaluronan-binding protein 4	250.5	837.5	414.5	413.4	219.5	126.2	F	GO:0003730
RNA87615	6.92941	0.0185095	XM_014167975.1	keratin type I cytoskeletal 18-like	0	0	4.5	0.2	39.1667	10.8	CF	GO:0005882;GO:0005198
RNA131586	5.55691	0.0185095	NM_001173900.1	complement component 1 q subcomponent B chain	0	0	0	0	12.8333	3.6	#N/A	#N/A
RNA65243	-1.66263	0.0185095	XM_014146999.1	prefoldin subunit 4-like	74.1667	346.75	150	138	73.1667	42	#N/A	#N/A
RNA44602	-1.14624	0.0185339	XM_014127362.1	signal peptidase complex catalytic subunit SEC11A	307.167	1270.25	517.5	444	432.667	241.4	CCCCFP	GO:0005789;GO:0016021;GO:0031090;GO:0070062;GO:0008236;GO:0006465
RNA92927	4.33988	0.0200201	NM_001165324.1	Integrin beta-2	0.666667	1.75	1	0.8	75.8333	17.4	CFPPP	GO:0008305;GO:0005044;GO:0006898;GO:0007160;GO:0007229
RNA35400	6.15264	0.0209698	XM_014212490.1	HLA class II histocompatibility antigen gamma chain-like	0	0.25	0.25	0	26.5	6.4	#N/A	#N/A
RNA77976	1.97769	0.0212864	XM_014158923.1	G protein-coupled estrogen receptor 1	2.16667	7.25	11.25	7	12	7.4	#N/A	#N/A
RNA23614	4.89046	0.0212864	XM_014201580.1	apolipoprotein Eb-like	0.333333	0.75	3	1.2	49.8333	10.6	#N/A	#N/A
RNA7561	6.47681	0.0260954	XM_014156674.1	chemokine-like receptor 1	0	0	0	0	6.66667	7.6	#N/A	#N/A
RNA516	-2.96619	0.0260954	XM_014133759.1	integrin beta-1-binding protein 1-like	11.8333	51.5	6.75	6.6	5.66667	2.4	#N/A	#N/A
RNA44378	1.16463	0.0260954	XM_014127153.1	cGMP-inhibited 3'5'-cyclic phosphodiesterase B-like	11.1667	34.5	46.75	35.4	35.5	24.8	CFFPP	GO:0016021;GO:0004114;GO:0046872;GO:0007165;GO:0048519
RNA32052	7.06517	0.0263392	XM_014209413.1	mucin-5AC-like	0.5	0	0.75	0.6	8.33333	12.6	#N/A	#N/A
RNA20682	6.25027	0.0263392	XM_014198764.1	uncharacterized LOC106604275	0.166667	0.5	0.25	0.6	2.33333	7.4	#N/A	#N/A
RNA76952	6.36597	0.0278314	NM_001279124.1	uncharacterized LOC101448051	0	0	0.5	0	2.83333	7.8	#N/A	#N/A
RNA46884	4.56271	0.0283129	XM_014129493.1	cytokine receptor common subunit gamma-like	1.66667	2	1	1.8	48.6667	20.6	C	GO:0016021
RNA32472	6.51206	0.0323263	XM_014209799.1	C-type lectin domain family 4 member E-like	0	0	0.25	0.2	4.83333	8.6	#N/A	#N/A
RNA75715	-2.21954	0.0328744	NA	NA	135.833	925.75	160.25	209.8	191.667	68.8	#N/A	#N/A
RNA14198	3.21124	0.0347443	XM_014192825.1	synaptic vesicle membrane protein VAT-1 homolog	1.83333	2.5	2.5	3.2	20.1667	14.6	FFFFFFFFFFP	GO:0005524;GO:0008270;GO:0008748;GO:0016787;GO:0043738;GO:0043826;GO:0043883;GO:0043914;GO:0048037;GO:0052693;GO:0055114
RNA67441	5.34169	0.0347443	XM_014148887.1	olfactomedin-4-like	0	0	0	0	48.1667	4.8	#N/A	#N/A
RNA8522	3.73174	0.0347443	XM_014165659.1	tyrosine-protein kinase-like otk	0.166667	3	4.5	0.8	3.5	6.6	#N/A	#N/A
RNA40633	-2.12797	0.0351792	NA	NA	56.8333	291.5	55.75	75	38.8333	26.8	#N/A	#N/A
RNA88003	-2.66163	0.04065	XM_014168286.1	protein SSUH2 homolog	75	169.5	32.25	40	25.8333	23.8	FF	GO:0031072;GO:0051082
RNA33610	0.869664	0.0420466	XM_014210704.1	transcription factor IIIB 90 kDa subunit-like	476.167	1204.5	1316.75	1143.6	1114	713	#N/A	#N/A
RNA49178	-5.65793	0.0420466	XM_014131639.1	chromodomain-helicase-DNA-binding protein 6-like transcript variant X6	7.16667	152.75	1	7.6	1.16667	2.6	CFF	GO:0005634;GO:0005524;GO:0016817
RNA57582	2.97392	0.0420466	XM_014139892.1	gelsolin-like	4.16667	13.5	9.75	11.8	23.1667	37	#N/A	#N/A
RNA52023	-1.75772	0.0432177	XM_014134197.1	pancreatic progenitor cell differentiation and proliferation factor B-like	294.333	1174.25	384.5	481.4	318.333	227.2	#N/A	#N/A
gene26468	6.77445	0.0432177	NA	NA	0.666667	0	0	0	2.83333	11.2	#N/A	#N/A
RNA47058	5.38563	0.0438276	XM_014129642.1	uncharacterized LOC106563789 transcript variant X1	0	0	0.25	0.6	12.3333	3.6	F	GO:0005525
RNA41593	5.68903	0.0457293	XM_014124361.1	olfactomedin-4-like	0	0	0	0	31.5	3.6	#N/A	#N/A
RNA125770	-2.93455	0.0474785	XM_014184761.1	mitogen-activated protein kinase kinase kinase 3-like	130.167	1126.75	80.5	144.2	91	59.2	CFFP	GO:0005737;GO:0004702;GO:0005524;GO:0006468
RNA81790	-2.91947	0.0474785	XM_014162408.1	protein yippee-like 2 transcript variant X1	3.83333	23.25	5.25	6.4	2.33333	2	CF	GO:0005730;GO:0046872
RNA64356	2.10331	0.0481938	XM_014145956.1	activity-dependent neuroprotector homeobox protein-like transcript variant X1	2.33333	12	15.75	12.6	16.8333	8.6	#N/A	#N/A
RNA52980	4.24014	0.0481938	NM_001141727.1	Bactericidal permeability-increasing protein	0	0.75	0.25	0.6	60.8333	5.8	CF	GO:0005615;GO:0008289
RNA71987	-1.48981	0.0481938	XM_014153193.1	ATP synthase subunit gamma mitochondrial-like transcript variant X1	38.6667	163.25	70.25	52	31.1667	23.4	#N/A	#N/A
Good 28 dpo versus 14 dpo											#N/A	#N/A
RNA67038	5.17419	0.0151956	NA	NA	0.5	1	1.25	1.4	107.833	39	#N/A	#N/A
RNA80433	8.08282	0.0151956	XM_014161399.1	L-serine dehydratase/L-threonine deaminase-like	0	0	0.25	0.4	19.1667	24.8	CFFFFFFPPPP	GO:0005739;GO:0003941;GO:0004672;GO:0004794;GO:0005524;GO:0030170;GO:0042803;GO:0006094;GO:0006468;GO:0006565;GO:0042866
RNA6471	8.2907	0.0151956	NA	NA	0.166667	0.25	0	0.2	24.5	28.6	#N/A	#N/A
RNA131588	5.6494	0.0151956	XM_014183112.1	complement C1q subcomponent subunit C-like	0	0	0	0	10.3333	5	CCP	GO:0005576;GO:0005581;GO:0006958
RNA55477	7.8415	0.0151956	NA	NA	0.166667	0	0.5	0	13.5	22	#N/A	#N/A
RNA66829	-1.28986	0.0151956	XM_014148374.1	transmembrane protein 60-like	43.3333	178.75	92	88.6	49.5	25.4	#N/A	#N/A
RNA8744	9.0608	0.0151956	NM_001123579.1	C type lectin receptor A	1	0	0.25	1.8	47.6667	49	#N/A	0
RNA35429	7.39415	0.0276766	XM_014212572.1	dual specificity protein phosphatase 1-like	0.333333	0.25	0.75	0	28.6667	15.4	#N/A	#N/A
RNA81434	7.31985	0.0384899	XM_014162065.1	tristetraprolin-like	0.166667	0	0.5	0.2	21.8333	14.6	#N/A	#N/A
RNA92927	4.79134	0.0405435	NM_001165324.1	Integrin beta-2	0.666667	1.75	1	0.8	75.8333	17.4	CFPPP	GO:0008305;GO:0005044;GO:0006898;GO:0007160;GO:0007229
RNA36617	7.30403	0.0405435	NM_001140451.1	Butyrate response factor 1	0	0.25	0.75	0.2	16.3333	15.8	CFFP	GO:0005829;GO:0003730;GO:0046872;GO:0061158
Poor 28 dpo versus 0 dpo											#N/A	#N/A
RNA43405	-4.6559	0.00927273	NA	NA	44	10.5	5	5.2	3.33333	2.2	#N/A	#N/A
Poor 14 dpo versus 0 dpo											#N/A	#N/A
RNA67441	8.95587	7.14514e-05	XM_014148887.1	olfactomedin-4-like	0	0	0	0	48.1667	4.8	#N/A	#N/A
RNA52980	7.8334	0.000105167	NM_001141727.1	Bactericidal permeability-increasing protein	0	0.75	0.25	0.6	60.8333	5.8	CF	GO:0005615;GO:0008289
RNA67038	6.4733	0.000254462	NA	NA	0.5	1	1.25	1.4	107.833	39	#N/A	#N/A
RNA131588	6.73165	0.000254462	XM_014183112.1	complement C1q subcomponent subunit C-like	0	0	0	0	10.3333	5	CCP	GO:0005576;GO:0005581;GO:0006958
RNA29072	5.34249	0.000254462	XM_014206628.1	ependymin-like	0.5	0.75	1.75	0.6	41.1667	4.8	#N/A	#N/A
RNA101416	5.08065	0.000254877	XM_014180756.1	collectin-12-like	1	2.5	4.5	2.6	19.5	4.4	CCFFP	GO:0005581;GO:0016021;GO:0030246;GO:0046872;GO:0001570
RNA107188	7.25824	0.000277644	NM_001173900.1	complement component 1 q subcomponent B chain	0	0	0	0.2	17	6.8	#N/A	#N/A
RNA43405	-4.85646	0.000630907	NA	NA	44	10.5	5	5.2	3.33333	2.2	#N/A	#N/A
RNA92927	6.08436	0.000746476	NM_001165324.1	Integrin beta-2	0.666667	1.75	1	0.8	75.8333	17.4	CFPPP	GO:0008305;GO:0005044;GO:0006898;GO:0007160;GO:0007229
RNA104920	-3.24052	0.000835236	NA	NA	45.1667	67	28.75	24	20.6667	30.4	#N/A	#N/A
RNA84457	8.118	0.000835236	XM_014164761.1	macrophage receptor MARCO-like	0.5	0	0	0.4	28.1667	7.2	#N/A	#N/A
RNA47370	8.75627	0.000955982	NM_001141779.1	complement component 1 q subcomponent C chain	0.166667	0.25	0	0	45.1667	4.2	CCP	GO:0005576;GO:0005581;GO:0006958
RNA16279	-7.55123	0.000955982	NA	NA	10.1667	15.5	1.5	2.8	0.5	1	#N/A	#N/A
RNA11036	5.07098	0.00101115	XM_014187510.1	macrophage mannose receptor 1-like	1.83333	4.5	6	4.6	41.6667	8.2	#N/A	#N/A
RNA28925	8.3142	0.00137963	NM_001165385.1	Macrosialin	0.166667	0	5.25	0.2	34.1667	15	C	GO:0016021
RNA131586	6.9085	0.00137963	NM_001173900.1	complement component 1 q subcomponent B chain	0	0	0	0	12.8333	3.6	#N/A	#N/A
RNA41593	8.22624	0.00137963	XM_014124361.1	olfactomedin-4-like	0	0	0	0	31.5	3.6	#N/A	#N/A
RNA23614	6.54337	0.00137963	XM_014201580.1	apolipoprotein Eb-like	0.333333	0.75	3	1.2	49.8333	10.6	#N/A	#N/A
RNA41984	6.94486	0.00173199	NA	NA	0	1.75	1.75	0.8	104.667	33.2	#N/A	#N/A
RNA50638	7.31403	0.00355733	XM_014133066.1	H-2 class II histocompatibility antigen A-U alpha chain-like	0	0.5	0	0	43.8333	4.4	#N/A	#N/A
RNA50637	7.1512	0.00536199	XM_014133067.1	H-2 class II histocompatibility antigen I-E beta chain	0.166667	0.5	1	0	44.3333	2.6	#N/A	#N/A
RNA47058	6.90195	0.00536199	XM_014129642.1	uncharacterized LOC106563789 transcript variant X1	0	0	0.25	0.6	12.3333	3.6	F	GO:0005525
RNA87615	8.57383	0.0060124	XM_014167975.1	keratin type I cytoskeletal 18-like	0	0	4.5	0.2	39.1667	10.8	CF	GO:0005882;GO:0005198
RNA36163	6.48448	0.00690159	XM_014213290.1	neuroblast differentiation-associated protein AHNAK-like	0.333333	1	14.25	1.2	105.167	20	#N/A	#N/A
RNA22786	6.86853	0.00915727	XM_014200821.1	cathepsin S-like	0	0.25	1	0.8	28.3333	13.4	#N/A	#N/A
RNA35400	6.82585	0.00915727	XM_014212490.1	HLA class II histocompatibility antigen gamma chain-like	0	0.25	0.25	0	26.5	6.4	#N/A	#N/A
RNA7517	7.87939	0.00975602	XM_014155590.1	apolipoprotein Eb-like	0	0.25	6.5	0.8	56.8333	12.4	#N/A	#N/A
RNA80433	7.34912	0.0100401	XM_014161399.1	L-serine dehydratase/L-threonine deaminase-like	0	0	0.25	0.4	19.1667	24.8	CFFFFFFPPPP	GO:0005739;GO:0003941;GO:0004672;GO:0004794;GO:0005524;GO:0030170;GO:0042803;GO:0006094;GO:0006468;GO:0006565;GO:0042866
RNA77401	-1.83954	0.0111833	XM_014158219.1	phosphatidylinositol glycan class F transcript variant X1	6.33333	22	13.25	9.8	7.16667	5	CCFFP	GO:0005789;GO:0016021;GO:0004307;GO:0016491;GO:0006506
RNA58915	5.84208	0.0155821	XM_014140845.1	uncharacterized LOC106569469	0	0.75	0.25	0.8	21.1667	6.4	#N/A	#N/A
RNA51026	7.39352	0.0155821	XM_014133282.1	transcription factor MafB-like	0	0	0	0.6	16.3333	5	#N/A	#N/A
RNA21868	4.71331	0.0263819	XM_014199873.1	dedicator of cytokinesis protein 2-like	0.833333	1.25	2.5	2.4	15.8333	4.2	#N/A	#N/A
RNA10632	7.45048	0.0263819	NM_001279112.1	serine protease-like protein	0	0.25	1.25	0	17.5	1.2	FP	GO:0004252;GO:0006508
RNA75619	-1.71587	0.0269503	NM_001140296.1	cyclin B3	122	320.25	152.25	145	70	54	CFPP	GO:0005634;GO:0019901;GO:0000079;GO:0010389
RNA15619	6.55188	0.0269503	XM_014194161.1	sterile alpha motif domain-containing protein 9-like	1	4.75	1	0.6	31.3333	8.6	#N/A	#N/A
RNA65579	7.03465	0.0311457	NM_001140215.1	Keratin type II cytoskeletal 8	0.166667	0	8.5	0	41.6667	6.2	CCCCFPP	GO:0005654;GO:0005737;GO:0016363;GO:0045095;GO:0005198;GO:0007601;GO:0050896
RNA84454	-1.09189	0.0337156	XM_014164764.1	acyl-CoA-binding protein	131	439.75	258.25	165.8	118.5	78.6	F	GO:0000062
RNA66829	-1.17921	0.0356353	XM_014148374.1	transmembrane protein 60-like	43.3333	178.75	92	88.6	49.5	25.4	#N/A	#N/A
RNA93829	3.03104	0.0362749	XM_014173846.1	lymphocyte cytosolic protein 1 (L-plastin)	5.5	17	14.5	17.6	53.8333	23.4	CCCCCCCCCCFFFFPPPPPPPPP	GO:0001725;GO:0001891;GO:0002102;GO:0005615;GO:0005829;GO:0005884;GO:0005925;GO:0030175;GO:0032587;GO:0070062;GO:0005509;GO:0042802;GO:0051015;GO:0051020;GO:0002286;GO:0010737;GO:0016477;GO:0022617;GO:0033157;GO:0051017;GO:0051639;GO:0051764;GO:0071803
RNA20438	3.70625	0.0498879	XM_014198569.1	neuroblast differentiation-associated protein AHNAK-like	5.33333	8.25	37.25	7.8	80.8333	18.2	#N/A	#N/A
poor 28 dpo versus 14 dpo											#N/A	#N/A
RNA67441	8.95587	1.30226e-06	XM_014148887.1	olfactomedin-4-like	0	0	0	0	48.1667	4.8	#N/A	#N/A
RNA67038	7.08508	1.30226e-06	NA	NA	0.5	1	1.25	1.4	107.833	39	#N/A	#N/A
RNA52980	7.80536	2.4401e-06	NM_001141727.1	Bactericidal permeability-increasing protein	0	0.75	0.25	0.6	60.8333	5.8	CF	GO:0005615;GO:0008289
RNA29072	5.59346	3.28362e-06	XM_014206628.1	ependymin-like	0.5	0.75	1.75	0.6	41.1667	4.8	#N/A	#N/A
RNA92927	6.74816	7.26066e-06	NM_001165324.1	Integrin beta-2	0.666667	1.75	1	0.8	75.8333	17.4	CFPPP	GO:0008305;GO:0005044;GO:0006898;GO:0007160;GO:0007229
RNA131588	6.73165	1.6991e-05	XM_014183112.1	complement C1q subcomponent subunit C-like	0	0	0	0	10.3333	5	CCP	GO:0005576;GO:0005581;GO:0006958
RNA107188	7.25824	1.99624e-05	NM_001173900.1	complement component 1 q subcomponent B chain	0	0	0	0.2	17	6.8	#N/A	#N/A
RNA50637	8.78277	4.36963e-05	XM_014133067.1	H-2 class II histocompatibility antigen I-E beta chain	0.166667	0.5	1	0	44.3333	2.6	#N/A	#N/A
RNA50638	8.71226	4.85282e-05	XM_014133066.1	H-2 class II histocompatibility antigen A-U alpha chain-like	0	0.5	0	0	43.8333	4.4	#N/A	#N/A
RNA47370	8.75627	8.57028e-05	NM_001141779.1	complement component 1 q subcomponent C chain	0.166667	0.25	0	0	45.1667	4.2	CCP	GO:0005576;GO:0005581;GO:0006958
RNA41984	7.22336	0.000168155	NA	NA	0	1.75	1.75	0.8	104.667	33.2	#N/A	#N/A
RNA41593	8.22624	0.000173457	XM_014124361.1	olfactomedin-4-like	0	0	0	0	31.5	3.6	#N/A	#N/A
RNA131586	6.9085	0.000213363	NM_001173900.1	complement component 1 q subcomponent B chain	0	0	0	0	12.8333	3.6	#N/A	#N/A
RNA84457	6.72634	0.00081183	XM_014164761.1	macrophage receptor MARCO-like	0.5	0	0	0.4	28.1667	7.2	#N/A	#N/A
RNA35400	6.74869	0.00230791	XM_014212490.1	HLA class II histocompatibility antigen gamma chain-like	0	0.25	0.25	0	26.5	6.4	#N/A	#N/A
RNA11038	3.13693	0.00565293	XM_014187528.1	macrophage mannose receptor 1-like	4.33333	13	9.25	9.4	37.1667	7.6	#N/A	#N/A
RNA23614	5.01504	0.00617817	XM_014201580.1	apolipoprotein Eb-like	0.333333	0.75	3	1.2	49.8333	10.6	#N/A	#N/A
RNA11810	5.41861	0.00650566	XM_014190053.1	gamma-interferon-inducible lysosomal thiol reductase-like	0.5	1.5	1.75	0.8	27.6667	2.2	FFP	GO:0015035;GO:0047134;GO:0055114
RNA24734	3.77961	0.00719008	NM_001141791.1	Galectin-3-binding protein	1.16667	5	2.25	2.2	20.1667	6	CFP	GO:0016020;GO:0005044;GO:0006898
RNA20337	4.78451	0.00785634	XM_014198502.1	dual specificity protein phosphatase 1-like	1.16667	3.75	1.75	1	34.5	3.4	CCFFFPPPPP	GO:0005634;GO:0005737;GO:0004725;GO:0016301;GO:0017017;GO:0000188;GO:0001706;GO:0016310;GO:0035335;GO:0042981
RNA15619	6.21184	0.00934428	XM_014194161.1	sterile alpha motif domain-containing protein 9-like	1	4.75	1	0.6	31.3333	8.6	#N/A	#N/A
RNA90692	6.94873	0.00969721	NM_001140576.1	Leukocyte surface antigen CD53	0.166667	1.25	0	0	14.1667	8.8	CP	GO:0005887;GO:0007166;
RNA11036	3.67244	0.00969721	XM_014187510.1	macrophage mannose receptor 1-like	1.83333	4.5	6	4.6	41.6667	8.2	#N/A	#N/A
RNA46884	5.21544	0.00969721	XM_014129493.1	cytokine receptor common subunit gamma-like	1.66667	2	1	1.8	48.6667	20.6	C	GO:0016021
RNA22786	5.74662	0.00981031	XM_014200821.1	cathepsin S-like	0	0.25	1	0.8	28.3333	13.4	#N/A	#N/A
RNA74074	5.73263	0.0123633	XM_014155220.1	interferon-induced very large GTPase 1-like	1.33333	1.75	0.25	0.6	14.3333	19.4	#N/A	#N/A
RNA59668	6.04282	0.0123633	XM_014142102.1	protein S100-A1-like	0.166667	0	0.25	0.2	15.5	2	#N/A	#N/A
RNA6471	6.34484	0.0174669	NA	NA	0.166667	0.25	0	0.2	24.5	28.6	#N/A	#N/A
RNA35429	5.79905	0.0184039	XM_014212572.1	dual specificity protein phosphatase 1-like	0.333333	0.25	0.75	0	28.6667	15.4	#N/A	#N/A
RNA87897	4.92416	0.0241664	NM_001139800.1	solute carrier family 6 (neurotransmitter transporter) member 6	0.166667	1	0.25	0.4	8.5	2.6	CFFPPP	GO:0005887;GO:0005328;GO:0005369;GO:0003333;GO:0006836;GO:0015734
RNA85074	3.30715	0.0241664	NA	NA	1.83333	5.75	2.25	2.4	16.6667	7.4	#N/A	#N/A
RNA75962	3.08844	0.0263505	XM_014156889.1	profilin-2-like	4	12.5	7.25	6.2	31.3333	11.2	CFPPPPP	GO:0005737;GO:0003779;GO:0030036;GO:0030833;GO:0032233;GO:0055113;GO:0060027
RNA58915	4.81839	0.0275808	XM_014140845.1	uncharacterized LOC106569469	0	0.75	0.25	0.8	21.1667	6.4	#N/A	#N/A
RNA39117	5.57171	0.0491221	XM_014216213.1	Krueppel-like factor 2	0.333333	2.5	1	1	28	5.6	#N/A	#N/A
poor 0 dpo versus good 14 dpo											#N/A	#N/A
rna22499	8.49457	0.0117872	NM_001140849.1	Hepcidin-1	10.8333	24.75	32.25	18.8	24.8333	23.2	CCFFFFPPPP	GO:0005576;GO:0005623;GO:0001530;GO:0005179;GO:0042834;GO:0070891;GO:0006879;GO:0008285;GO:0050829;GO:0050830
rna124258	2.27278	0.0117872	XM_014183614.1	bromodomain-containing protein 4-like	35.3333	121	75.5	54.6	37.8333	27	#N/A	#N/A
rna29287	1.38372	0.0220013	XM_014206922.1	thyroid receptor-interacting protein 6-like transcript variant X7	314.833	917.75	641.5	309.4	420.167	350.8	#N/A	#N/A
rna6614	3.18836	0.0220013	XM_014146624.1	pollen-specific leucine-rich repeat extensin-like protein 1	9	20	15	5.8	5	4.4	#N/A	#N/A
rna34935	-8.8099	0.0220013	XM_014212117.1	reticulon-4 receptor-like 2	1.5	35.25	29.5	36.8	26.6667	8.6	#N/A	#N/A
rna43405	4.32936	0.0323505	NA	NA	44	10.5	5	5.2	3.33333	2.2	#N/A	#N/A
rna47702	1.49254	0.0323505	XM_014130214.1	partner and localizer of BRCA2-like	46.3333	164.25	92.75	55.2	59.8333	42.8	#N/A	#N/A
rna60706	-1.61164	0.0440271	XM_014142650.1	zinc finger CCCH-type containing 12A	96.1667	252	220.5	266.8	185	158.2	#N/A	#N/A
poor 0 dpo versus good 28 dpo											#N/A	#N/A
rna43405	5.10833	0.000127445	NA	NA	44	10.5	5	5.2	3.33333	2.2	#N/A	#N/A
rna6614	3.56937	0.000190791	XM_014146624.1	pollen-specific leucine-rich repeat extensin-like protein 1	9	20	15	5.8	5	4.4	#N/A	#N/A
rna66829	1.56735	0.000190791	XM_014148374.1	transmembrane protein 60-like	43.3333	178.75	92	88.6	49.5	25.4	#N/A	#N/A
rna34005	1.62661	0.00035128	XM_014211237.1	proteasome subunit alpha type-3	54.3333	193.5	109.5	86.2	55	23.8	#N/A	#N/A
rna67038	-5.67992	0.00215171	NA	NA	0.5	1	1.25	1.4	107.833	39	#N/A	#N/A
rna95388	2.36077	0.00215171	XM_014175254.1	zinc finger protein SNAI2-like	6.83333	53.5	19	9.6	6.83333	3.8	#N/A	#N/A
rna63753	2.80357	0.00225261	XM_014145436.1	F-box and WD repeat domain containing 12	4.83333	38.75	11.75	9	4.16667	1.6	#N/A	#N/A
rna46021	1.46491	0.00334452	XM_014128669.1	fatty acid binding protein 1 liver	51.8333	174.75	96.75	64.6	42.8333	24.8	CCCFFFFPPPPPPPP	GO:0005654;GO:0005737;GO:0070062;GO:0003682;GO:0005215;GO:0008289;GO:0016209;GO:0002230;GO:0006810;GO:0043154;GO:0070301;GO:0071456;GO:0098779;GO:0098792;GO:0098869
rna84454	1.22683	0.00461544	XM_014164764.1	acyl-CoA-binding protein	131	439.75	258.25	165.8	118.5	78.6	F	GO:0000062
rna89555	1.88588	0.00463352	XM_014169800.1	protein QIL1-like	91.5	375	155	118	97.3333	58.2	#N/A	#N/A
rna80433	-8.08282	0.00463352	XM_014161399.1	L-serine dehydratase/L-threonine deaminase-like	0	0	0.25	0.4	19.1667	24.8	CFFFFFFPPPP	GO:0005739;GO:0003941;GO:0004672;GO:0004794;GO:0005524;GO:0030170;GO:0042803;GO:0006094;GO:0006468;GO:0006565;GO:0042866
rna107188	-6.26403	0.00495089	NM_001173900.1	complement component 1 q subcomponent B chain	0	0	0	0.2	17	6.8	#N/A	#N/A
rna80189	-4.1826	0.00495089	XM_014160287.1	serine/threonine-protein kinase ULK1-like transcript variant X7	3.83333	5	4.5	6	6	6.8	#N/A	#N/A
rna48792	1.36719	0.00645693	XM_014131372.1	beta-2-glycoprotein 1-like	16.5	57	33.75	26.2	16.1667	8	#N/A	#N/A
rna25307	1.62824	0.00720228	NA	NA	32.3333	112.75	66.5	59	34.5	14	#N/A	#N/A
rna131588	-5.6494	0.00720228	XM_014183112.1	complement C1q subcomponent subunit C-like	0	0	0	0	10.3333	5	CCP	GO:0005576;GO:0005581;GO:0006958
rna75619	1.79693	0.00743743	NM_001140296.1	cyclin B3	122	320.25	152.25	145	70	54	CFPP	GO:0005634;GO:0019901;GO:0000079;GO:0010389
rna70557	1.43282	0.00780905	XM_014151875.1	zinc finger protein 2-like	126.167	352.5	314.75	198	157.833	112	#N/A	#N/A
rna75788	6.68415	0.00780905	XM_014156747.1	leucine-rich repeat and fibronectin type-III domain-containing protein 2-like	0.833333	27	7.25	1.2	1.66667	1.8	#N/A	#N/A
gene35807	-2.3097	0.00813349	NA	NA	51.8333	61.5	67.5	72	65.5	62.6	#N/A	#N/A
rna28925	-7.35455	0.00839643	NM_001165385.1	Macrosialin	0.166667	0	5.25	0.2	34.1667	15	C	GO:0016021
rna22499	5.54448	0.00882501	NM_001140849.1	Hepcidin-1	10.8333	24.75	32.25	18.8	24.8333	23.2	CCFFFFPPPP	GO:0005576;GO:0005623;GO:0001530;GO:0005179;GO:0042834;GO:0070891;GO:0006879;GO:0008285;GO:0050829;GO:0050830
rna46051	1.71943	0.00882501	XM_014128645.1	phosphohistidine phosphatase 1	21	104.5	57	28.6	24.1667	15	#N/A	#N/A
gene10405	3.6405	0.00988302	NA	NA	31.8333	435.25	424.5	26.4	168.167	12.6	#N/A	#N/A
rna83092	-1.98699	0.0131813	XM_014163657.1	high affinity cationic amino acid transporter 1-like	3.5	7.5	16.75	11.8	11.8333	7.4	#N/A	#N/A
rna41984	-5.92629	0.0131813	NA	NA	0	1.75	1.75	0.8	104.667	33.2	#N/A	#N/A
rna34935	-7.96481	0.0136245	XM_014212117.1	reticulon-4 receptor-like 2	1.5	35.25	29.5	36.8	26.6667	8.6	#N/A	#N/A
rna106569	6.52864	0.0220942	XM_014182909.1	GTPase IMAP family member 8-like	26.6667	126.5	115.75	62.8	107.167	42.2	#N/A	#N/A
rna84457	-6.27503	0.0291044	XM_014164761.1	macrophage receptor MARCO-like	0.5	0	0	0.4	28.1667	7.2	#N/A	#N/A
rna49703	1.42059	0.0338865	XM_014131878.1	G0/G1 switch protein 2-like	224.167	860.25	342.5	249	188.667	119.6	#N/A	#N/A
rna63662	3.55602	0.0351519	XM_014145338.1	uncharacterized LOC106571848	11	48.25	44.5	13.6	19.5	1.6	#N/A	#N/A
rna31194	2.81276	0.0363297	XM_014208635.1	alpha-N-acetylneuraminide alpha-28-sialyltransferase-like	15.3333	20.75	7.5	8.8	6.33333	4.4	#N/A	#N/A
rna42330	2.54276	0.0385985	XM_014125405.1	zinc finger protein 2 homolog	3.5	21.5	7.5	5.6	3.5	2.6	#N/A	#N/A
rna22786	-6.05364	0.0385985	XM_014200821.1	cathepsin S-like	0	0.25	1	0.8	28.3333	13.4	#N/A	#N/A
rna131586	-5.55691	0.038915	NM_001173900.1	complement component 1 q subcomponent B chain	0	0	0	0	12.8333	3.6	#N/A	#N/A
rna48789	-6.1602	0.0433512	NA	NA	20.1667	44.5	28.5	35.8	46.8333	16.6	#N/A	#N/A
rna25951	-0.865017	0.0436703	XM_014203945.1	non-receptor tyrosine-protein kinase TYK2-like	241.5	571.75	556	554.4	519	317.8	#N/A	#N/A
rna70752	2.10968	0.0436703	NA	NA	6.33333	17.25	13.5	9	7.33333	2.4	#N/A	#N/A
rna7879	4.79957	0.0450416	XM_014159237.1	nucleotide-binding oligomerization domain-containing protein 1-like	17.8333	34.75	38.25	25.4	17.5	12.6	#N/A	#N/A
rna101416	-3.64176	0.0458533	XM_014180756.1	collectin-12-like	1	2.5	4.5	2.6	19.5	4.4	CCFFP	GO:0005581;GO:0016021;GO:0030246;GO:0046872;GO:0001570
rna22778	1.21881	0.0458533	XM_014200814.1	protein S100-A1	93.6667	323.5	153.75	130.8	73.6667	49	#N/A	#N/A
rna1115	1.51053	0.0458533	XM_014188788.1	39S ribosomal protein L35 mitochondrial-like	42.6667	168.25	110	63.4	47	28.4	#N/A	#N/A
rna4714	1.76165	0.0466088	NA	NA	14.8333	54.5	32.75	27.6	12.5	5.2	#N/A	#N/A
rna92927	-4.29195	0.0466088	NM_001165324.1	Integrin beta-2	0.666667	1.75	1	0.8	75.8333	17.4	CFPPP	GO:0008305;GO:0005044;GO:0006898;GO:0007160;GO:0007229
rna54189	1.73253	0.0466088	XM_014136275.1	PRA1 family protein 2-like	11.1667	28.5	15	10.2	9	4.2	#N/A	#N/A
rna97224	0.814453	0.0466088	XM_014176875.1	chromosome ssa27 open reading frame human C1orf43	161.833	578	423.75	258.8	214.167	145.6	#N/A	#N/A
rna87615	-6.92941	0.0466088	XM_014167975.1	keratin type I cytoskeletal 18-like	0	0	4.5	0.2	39.1667	10.8	CF	GO:0005882;GO:0005198
rna55477	-6.17609	0.0466338	NA	NA	0.166667	0	0.5	0	13.5	22	#N/A	#N/A
rna52980	-4.89685	0.0487818	NM_001141727.1	Bactericidal permeability-increasing protein	0	0.75	0.25	0.6	60.8333	5.8	CF	GO:0005615;GO:0008289
rna48190	1.39483	0.0487818	NA	NA	48	158.5	79.75	46.6	41.3333	25.8	#N/A	#N/A
poor 14 dpo versus good 0 dpo											#N/A	#N/A
rna22499	8.61021	0.00142737	NM_001140849.1	Hepcidin-1	10.8333	24.75	32.25	18.8	24.8333	23.2	CCFFFFPPPP	GO:0005576;GO:0005623;GO:0001530;GO:0005179;GO:0042834;GO:0070891;GO:0006879;GO:0008285;GO:0050829;GO:0050830
rna75715	-3.26344	0.00245088	NA	NA	135.833	925.75	160.25	209.8	191.667	68.8	#N/A	#N/A
rna70557	1.43298	0.0284345	XM_014151875.1	zinc finger protein 2-like	126.167	352.5	314.75	198	157.833	112	#N/A	#N/A
gene10405	3.77758	0.0284345	NA	NA	31.8333	435.25	424.5	26.4	168.167	12.6	#N/A	#N/A
rna59609	5.15724	0.0438489	XM_014142155.1	basic salivary proline-rich protein 4-like transcript variant X1	0.5	3.25	5.25	3	2.5	2	#N/A	#N/A
rna44602	-1.27982	0.0438489	XM_014127362.1	signal peptidase complex catalytic subunit SEC11A	307.167	1270.25	517.5	444	432.667	241.4	CCCCFP	GO:0005789;GO:0016021;GO:0031090;GO:0070062;GO:0008236;GO:0006465
rna31217	3.56925	0.047214	XM_014208654.1	NUAK family SNF1-like kinase 1	1.5	3.75	9	5	3.66667	3.2	#N/A	#N/A
rna34935	-6.75532	0.047214	XM_014212117.1	reticulon-4 receptor-like 2	1.5	35.25	29.5	36.8	26.6667	8.6	#N/A	#N/A
gene35807	-2.02986	0.047214	NA	NA	51.8333	61.5	67.5	72	65.5	62.6	#N/A	#N/A
poor 14 dpo versus good 28 dpo											#N/A	#N/A
rna67038	-6.2917	6.99432e-05	NA	NA	0.5	1	1.25	1.4	107.833	39	#N/A	#N/A
rna107188	-6.26403	0.00488725	NM_001173900.1	complement component 1 q subcomponent B chain	0	0	0	0.2	17	6.8	#N/A	#N/A
rna131588	-5.6494	0.00602676	XM_014183112.1	complement C1q subcomponent subunit C-like	0	0	0	0	10.3333	5	CCP	GO:0005576;GO:0005581;GO:0006958
rna74074	-6.43143	0.00602676	XM_014155220.1	interferon-induced very large GTPase 1-like	1.33333	1.75	0.25	0.6	14.3333	19.4	#N/A	#N/A
rna41984	-6.20479	0.00602676	NA	NA	0	1.75	1.75	0.8	104.667	33.2	#N/A	#N/A
rna70557	1.45626	0.00602676	XM_014151875.1	zinc finger protein 2-like	126.167	352.5	314.75	198	157.833	112	#N/A	#N/A
gene35807	-2.22783	0.00622819	NA	NA	51.8333	61.5	67.5	72	65.5	62.6	#N/A	#N/A
rna92927	-4.95575	0.00622819	NM_001165324.1	Integrin beta-2	0.666667	1.75	1	0.8	75.8333	17.4	CFPPP	GO:0008305;GO:0005044;GO:0006898;GO:0007160;GO:0007229
rna22499	5.66013	0.00902851	NM_001140849.1	Hepcidin-1	10.8333	24.75	32.25	18.8	24.8333	23.2	CCFFFFPPPP	GO:0005576;GO:0005623;GO:0001530;GO:0005179;GO:0042834;GO:0070891;GO:0006879;GO:0008285;GO:0050829;GO:0050830
rna7742	-7.1451	0.00902851	XM_014157806.1	carcinoembryonic antigen-related cell adhesion molecule 20-like	0.5	0	0	0.2	6.5	11.6	#N/A	#N/A
rna26368	6.34869	0.00902851	XM_014204314.1	estradiol 17-beta-dehydrogenase 1-like	2.5	8	18.75	18.2	6.33333	4.6	#N/A	#N/A
rna6471	-6.88466	0.00939745	NA	NA	0.166667	0.25	0	0.2	24.5	28.6	#N/A	#N/A
gene10405	3.60733	0.0128176	NA	NA	31.8333	435.25	424.5	26.4	168.167	12.6	#N/A	#N/A
rna79044	-9.93095	0.0154887	XM_014159798.1	potassium voltage-gated channel subfamily H member 2-like	32.8333	22	0	101.6	76.1667	32.2	#N/A	#N/A
rna90692	-6.68223	0.0221758	NM_001140576.1	Leukocyte surface antigen CD53	0.166667	1.25	0	0	14.1667	8.8	CP	GO:0005887;GO:0007166;
rna131586	-5.55691	0.0221758	NM_001173900.1	complement component 1 q subcomponent B chain	0	0	0	0	12.8333	3.6	#N/A	#N/A
rna55477	-5.97567	0.0221758	NA	NA	0.166667	0	0.5	0	13.5	22	#N/A	#N/A
rna34935	-6.73021	0.0221758	XM_014212117.1	reticulon-4 receptor-like 2	1.5	35.25	29.5	36.8	26.6667	8.6	#N/A	#N/A
rna106569	6.49556	0.026476	XM_014182909.1	GTPase IMAP family member 8-like	26.6667	126.5	115.75	62.8	107.167	42.2	#N/A	#N/A
rna50638	-6.13185	0.026476	XM_014133066.1	H-2 class II histocompatibility antigen A-U alpha chain-like	0	0.5	0	0	43.8333	4.4	#N/A	#N/A
rna80433	-5.57444	0.0269503	XM_014161399.1	L-serine dehydratase/L-threonine deaminase-like	0	0	0.25	0.4	19.1667	24.8	CFFFFFFPPPP	GO:0005739;GO:0003941;GO:0004672;GO:0004794;GO:0005524;GO:0030170;GO:0042803;GO:0006094;GO:0006468;GO:0006565;GO:0042866
rna52980	-4.86882	0.0313857	NM_001141727.1	Bactericidal permeability-increasing protein	0	0.75	0.25	0.6	60.8333	5.8	CF	GO:0005615;GO:0008289
rna7561	-6.47681	0.0324835	XM_014156674.1	chemokine-like receptor 1	0	0	0	0	6.66667	7.6	#N/A	#N/A
rna47370	-6.04567	0.0394779	NM_001141779.1	complement component 1 q subcomponent C chain	0.166667	0.25	0	0	45.1667	4.2	CCP	GO:0005576;GO:0005581;GO:0006958
rna67441	-5.34169	0.0453163	XM_014148887.1	olfactomedin-4-like	0	0	0	0	48.1667	4.8	#N/A	#N/A
rna75788	5.81111	0.0486324	XM_014156747.1	leucine-rich repeat and fibronectin type-III domain-containing protein 2-like	0.833333	27	7.25	1.2	1.66667	1.8	#N/A	#N/A
rna48789	-5.37276	0.0492794	NA	NA	20.1667	44.5	28.5	35.8	46.8333	16.6	#N/A	#N/A
rna78224	-6.0737	0.0492794	XM_014158712.1	endonuclease domain-containing 1 protein-like	0.166667	0	0	0	7.33333	5.6	#N/A	#N/A
Poor 28 dpo versus good 0 dpo											#N/A	#N/A
rna29072	7.2551	1.33702e-07	XM_014206628.1	ependymin-like	0.5	0.75	1.75	0.6	41.1667	4.8	#N/A	#N/A
rna67038	7.76037	1.49985e-07	NA	NA	0.5	1	1.25	1.4	107.833	39	#N/A	#N/A
rna67441	8.95587	8.36693e-07	XM_014148887.1	olfactomedin-4-like	0	0	0	0	48.1667	4.8	#N/A	#N/A
rna36163	9.92506	2.18084e-06	XM_014213290.1	neuroblast differentiation-associated protein AHNAK-like	0.333333	1	14.25	1.2	105.167	20	#N/A	#N/A
rna52980	7.17668	4.56325e-06	NM_001141727.1	Bactericidal permeability-increasing protein	0	0.75	0.25	0.6	60.8333	5.8	CF	GO:0005615;GO:0008289
rna41984	8.42046	1.39898e-05	NA	NA	0	1.75	1.75	0.8	104.667	33.2	#N/A	#N/A
rna22499	9.3622	2.0627e-05	NM_001140849.1	Hepcidin-1	10.8333	24.75	32.25	18.8	24.8333	23.2	CCFFFFPPPP	GO:0005576;GO:0005623;GO:0001530;GO:0005179;GO:0042834;GO:0070891;GO:0006879;GO:0008285;GO:0050829;GO:0050830
rna131588	6.73165	3.16739e-05	XM_014183112.1	complement C1q subcomponent subunit C-like	0	0	0	0	10.3333	5	CCP	GO:0005576;GO:0005581;GO:0006958
rna107188	7.25824	3.40475e-05	NM_001173900.1	complement component 1 q subcomponent B chain	0	0	0	0.2	17	6.8	#N/A	#N/A
rna92927	6.13229	4.8133e-05	NM_001165324.1	Integrin beta-2	0.666667	1.75	1	0.8	75.8333	17.4	CFPPP	GO:0008305;GO:0005044;GO:0006898;GO:0007160;GO:0007229
rna23614	6.76672	0.000106574	XM_014201580.1	apolipoprotein Eb-like	0.333333	0.75	3	1.2	49.8333	10.6	#N/A	#N/A
rna41593	8.22624	0.00022555	XM_014124361.1	olfactomedin-4-like	0	0	0	0	31.5	3.6	#N/A	#N/A
rna7517	9.02525	0.000312038	XM_014155590.1	apolipoprotein Eb-like	0	0.25	6.5	0.8	56.8333	12.4	#N/A	#N/A
rna22786	8.04191	0.000320763	XM_014200821.1	cathepsin S-like	0	0.25	1	0.8	28.3333	13.4	#N/A	#N/A
rna35400	8.00029	0.000320763	XM_014212490.1	HLA class II histocompatibility antigen gamma chain-like	0	0.25	0.25	0	26.5	6.4	#N/A	#N/A
rna131586	6.9085	0.000339298	NM_001173900.1	complement component 1 q subcomponent B chain	0	0	0	0	12.8333	3.6	#N/A	#N/A
rna50638	7.31863	0.000351745	XM_014133066.1	H-2 class II histocompatibility antigen A-U alpha chain-like	0	0.5	0	0	43.8333	4.4	#N/A	#N/A
rna65579	8.72724	0.000380268	NM_001140215.1	Keratin type II cytoskeletal 8	0.166667	0	8.5	0	41.6667	6.2	CCCCFPP	GO:0005654;GO:0005737;GO:0016363;GO:0045095;GO:0005198;GO:0007601;GO:0050896
rna50637	6.79821	0.000661039	XM_014133067.1	H-2 class II histocompatibility antigen I-E beta chain	0.166667	0.5	1	0	44.3333	2.6	#N/A	#N/A
rna75715	-3.12561	0.000661039	NA	NA	135.833	925.75	160.25	209.8	191.667	68.8	#N/A	#N/A
rna87615	8.57383	0.00076307	XM_014167975.1	keratin type I cytoskeletal 18-like	0	0	4.5	0.2	39.1667	10.8	CF	GO:0005882;GO:0005198
rna28925	6.93764	0.00121432	NM_001165385.1	Macrosialin	0.166667	0	5.25	0.2	34.1667	15	C	GO:0016021
rna11810	6.08461	0.00121432	XM_014190053.1	gamma-interferon-inducible lysosomal thiol reductase-like	0.5	1.5	1.75	0.8	27.6667	2.2	FFP	GO:0015035;GO:0047134;GO:0055114
rna47058	6.90195	0.00121432	XM_014129642.1	uncharacterized LOC106563789 transcript variant X1	0	0	0.25	0.6	12.3333	3.6	F	GO:0005525
rna47370	6.71299	0.00123577	NM_001141779.1	complement component 1 q subcomponent C chain	0.166667	0.25	0	0	45.1667	4.2	CCP	GO:0005576;GO:0005581;GO:0006958
rna58915	6.38579	0.00123577	XM_014140845.1	uncharacterized LOC106569469	0	0.75	0.25	0.8	21.1667	6.4	#N/A	#N/A
rna6471	7.75088	0.0018091	NA	NA	0.166667	0.25	0	0.2	24.5	28.6	#N/A	#N/A
rna81434	7.65445	0.0018091	XM_014162065.1	tristetraprolin-like	0.166667	0	0.5	0.2	21.8333	14.6	#N/A	#N/A
rna59668	7.29105	0.0018091	XM_014142102.1	protein S100-A1-like	0.166667	0	0.25	0.2	15.5	2	#N/A	#N/A
rna80433	7.34912	0.0020148	XM_014161399.1	L-serine dehydratase/L-threonine deaminase-like	0	0	0.25	0.4	19.1667	24.8	CFFFFFFPPPP	GO:0005739;GO:0003941;GO:0004672;GO:0004794;GO:0005524;GO:0030170;GO:0042803;GO:0006094;GO:0006468;GO:0006565;GO:0042866
rna24734	3.96288	0.00242139	NM_001141791.1	Galectin-3-binding protein	1.16667	5	2.25	2.2	20.1667	6	CFP	GO:0016020;GO:0005044;GO:0006898
rna46884	5.43121	0.00287029	XM_014129493.1	cytokine receptor common subunit gamma-like	1.66667	2	1	1.8	48.6667	20.6	C	GO:0016021
rna35429	6.75756	0.00314557	XM_014212572.1	dual specificity protein phosphatase 1-like	0.333333	0.25	0.75	0	28.6667	15.4	#N/A	#N/A
rna51026	7.39352	0.00314557	XM_014133282.1	transcription factor MafB-like	0	0	0	0.6	16.3333	5	#N/A	#N/A
rna84457	5.54264	0.00392652	XM_014164761.1	macrophage receptor MARCO-like	0.5	0	0	0.4	28.1667	7.2	#N/A	#N/A
rna43757	1.75812	0.00392652	XM_014126526.1	protein C19orf12 homolog transcript variant X1	9.33333	16.25	33.25	23.8	34.3333	16.4	#N/A	#N/A
rna36617	7.32665	0.00392652	NM_001140451.1	Butyrate response factor 1	0	0.25	0.75	0.2	16.3333	15.8	CFFP	GO:0005829;GO:0003730;GO:0046872;GO:0061158
rna104920	-2.76148	0.00392652	NA	NA	45.1667	67	28.75	24	20.6667	30.4	#N/A	#N/A
gene10405	3.71612	0.00392652	NA	NA	31.8333	435.25	424.5	26.4	168.167	12.6	#N/A	#N/A
gene35807	-2.16682	0.00392652	NA	NA	51.8333	61.5	67.5	72	65.5	62.6	#N/A	#N/A
rna11036	3.66597	0.00392652	XM_014187510.1	macrophage mannose receptor 1-like	1.83333	4.5	6	4.6	41.6667	8.2	#N/A	#N/A
rna133458	-3.07405	0.00430345	NA	NA	192.833	3777	368.5	333.2	347.667	206.6	#N/A	#N/A
rna40633	-2.63545	0.00491924	NA	NA	56.8333	291.5	55.75	75	38.8333	26.8	#N/A	#N/A
rna67149	2.07694	0.0052024	NA	NA	2.33333	11.5	13.25	9.6	12	7	#N/A	#N/A
rna20438	3.67223	0.00548524	XM_014198569.1	neuroblast differentiation-associated protein AHNAK-like	5.33333	8.25	37.25	7.8	80.8333	18.2	#N/A	#N/A
rna10330	3.68519	0.0055394	XM_014182714.1	sialoadhesin-like	1.16667	5.75	6.75	3	18.3333	5.6	#N/A	#N/A
rna58935	-2.80554	0.0055394	XM_014140827.1	phospholipid hydroperoxide glutathione peroxidase mitochondrial	1129.67	6350.5	1845.5	1790.6	1261.83	494.8	#N/A	#N/A
rna8744	7.33372	0.005557	NM_001123579.1	C type lectin receptor A	1	0	0.25	1.8	47.6667	49	#N/A	0
rna33589	2.02117	0.00564369	XM_014210715.1	sacsin-like transcript variant X1	38.1667	110.75	101.25	65	184	77.8	#N/A	#N/A
rna55477	6.84454	0.006327	NA	NA	0.166667	0	0.5	0	13.5	22	#N/A	#N/A
rna29303	-2.68648	0.00637523	NA	NA	3.5	12	5.5	5.8	4.16667	1.4	#N/A	#N/A
rna7578	4.30845	0.00642546	XM_014156544.1	urokinase plasminogen activator surface receptor-like	3.33333	8.5	8	8.4	90	32.6	#N/A	#N/A
rna20213	6.64763	0.00657517	XM_014198390.1	Barrier-to-autointegration factor B transcript variant X1	0.166667	0.25	0.25	0	8.5	5.8	#N/A	#N/A
rna11799	4.04149	0.00741529	NA	NA	1.16667	5.5	5.75	2.6	22.8333	12	#N/A	#N/A
rna133398	3.24346	0.00790068	XM_014188167.1	protein PML-like	2.33333	8.25	11.5	6.4	19.8333	6.6	#N/A	#N/A
rna133455	-2.52372	0.00791251	NA	NA	369.667	2903	419.5	473.2	362.167	277.4	#N/A	#N/A
rna29036	6.70234	0.00869926	XM_014206630.1	tyrosine-protein kinase receptor TYRO3-like	0.333333	0.75	0.5	0.4	11.3333	4.6	#N/A	#N/A
rna68564	4.51888	0.00926822	XM_014150221.1	transmembrane protease serine 3-like	0.666667	2.25	4.25	4.2	3.33333	3.4	#N/A	#N/A
rna47438	-2.06282	0.00926822	XM_014129975.1	gastrula zinc finger protein XlCGF17.1-like	31	177	62.25	45.4	28.3333	15.4	#N/A	#N/A
rna16279	-6.24746	0.00926822	NA	NA	10.1667	15.5	1.5	2.8	0.5	1	#N/A	#N/A
rna43166	-2.30531	0.00926822	XM_014125981.1	WASP homolog-associated protein with actin membranes and microtubules-like	190.833	1126.5	261.25	251	207	137.8	FPP	GO:0008092;GO:0016043;GO:0044763
rna20337	4.26293	0.00926822	XM_014198502.1	dual specificity protein phosphatase 1-like	1.16667	3.75	1.75	1	34.5	3.4	CCFFFPPPPP	GO:0005634;GO:0005737;GO:0004725;GO:0016301;GO:0017017;GO:0000188;GO:0001706;GO:0016310;GO:0035335;GO:0042981
rna101416	3.07099	0.0100776	XM_014180756.1	collectin-12-like	1	2.5	4.5	2.6	19.5	4.4	CCFFP	GO:0005581;GO:0016021;GO:0030246;GO:0046872;GO:0001570
rna88003	-3.14152	0.0102655	XM_014168286.1	protein SSUH2 homolog	75	169.5	32.25	40	25.8333	23.8	FF	GO:0031072;GO:0051082
rna4387	-2.0614	0.0103383	XM_014125913.1	NADH dehydrogenase [ubiquinone] 1 alpha subcomplex subunit 8-like	86.3333	382	130.5	144.8	76.1667	38.4	CCFFPP	GO:0005747;GO:0005758;GO:0008137;GO:0032403;GO:0006810;GO:0055114
rna14198	3.44631	0.011244	XM_014192825.1	synaptic vesicle membrane protein VAT-1 homolog	1.83333	2.5	2.5	3.2	20.1667	14.6	FFFFFFFFFFP	GO:0005524;GO:0008270;GO:0008748;GO:0016787;GO:0043738;GO:0043826;GO:0043883;GO:0043914;GO:0048037;GO:0052693;GO:0055114
rna106569	6.39348	0.0132114	XM_014182909.1	GTPase IMAP family member 8-like	26.6667	126.5	115.75	62.8	107.167	42.2	#N/A	#N/A
rna15485	1.32527	0.0132734	XM_014194058.1	protein YIPF1-like transcript variant X1	35	98.75	115.5	94	116.333	58.8	#N/A	#N/A
rna55815	2.99612	0.0139651	XM_014137595.1	zinc finger and SCAN domain-containing protein 21-like transcript variant X3	0.833333	3.75	6.25	3.2	4.66667	2.4	#N/A	#N/A
rna111961	-3.22408	0.0159514	NA	NA	91.6667	346	47.75	63.2	38.3333	25.2	#N/A	#N/A
rna133460	-2.55987	0.0191458	NA	NA	732	6860.25	951.75	901	1101	507.8	#N/A	#N/A
rna67781	-2.32689	0.0197653	XM_014149438.1	uncharacterized LOC106573957	4.33333	14.25	7	5.8	3.66667	3.8	#N/A	#N/A
rna133450	-1.45638	0.0197653	NA	NA	158.333	815.75	249.75	190	205.167	158.6	#N/A	#N/A
rna48436	-1.94932	0.0200636	XM_014130886.1	small ubiquitin-related modifier 2-like	46.5	335	87	68	57.6667	43	#N/A	#N/A
rna47230	-1.28743	0.0200636	NM_001146524.1	ubiquitin-fold modifier 1	41.6667	159.25	72.75	51.6	43.8333	29	CCCPPP	GO:0005634;GO:0005737;GO:0070062;GO:0033146;GO:0034976;GO:1990592
rna23971	-2.6602	0.0200636	XM_014201907.1	B-cell receptor CD22-like	4.16667	10	7	4.8	1.66667	3	#N/A	#N/A
rna95980	4.66626	0.0202388	XM_014175897.1	transcription factor PU.1-like	0.5	1.5	3	0.8	25.5	11.6	#N/A	#N/A
rna63642	-4.50477	0.0202388	XM_014145343.1	amphoterin-induced protein 3-like	2.5	13.75	1	2.6	1	1.2	#N/A	#N/A
rna10632	6.13206	0.0202388	NM_001279112.1	serine protease-like protein	0	0.25	1.25	0	17.5	1.2	FP	GO:0004252;GO:0006508
rna78157	-2.70652	0.020903	NA	NA	19.8333	70	13.75	20.4	15.6667	12.6	#N/A	#N/A
rna37840	-2.77115	0.0216102	XM_014215032.1	seizure protein 6 homolog	24.5	103	24.75	39.4	25.8333	16.4	#N/A	#N/A
rna22778	-1.22373	0.0224674	XM_014200814.1	protein S100-A1	93.6667	323.5	153.75	130.8	73.6667	49	#N/A	#N/A
rna72563	-3.49555	0.0231885	NA	NA	64	762.25	50.25	69.4	46	32.4	#N/A	#N/A
rna133442	-2.75663	0.0234309	NA	NA	164.833	1117	125	159	125	88.2	#N/A	#N/A
rna64356	2.22987	0.0238824	XM_014145956.1	activity-dependent neuroprotector homeobox protein-like transcript variant X1	2.33333	12	15.75	12.6	16.8333	8.6	#N/A	#N/A
rna516	-3.10148	0.0245544	XM_014133759.1	integrin beta-1-binding protein 1-like	11.8333	51.5	6.75	6.6	5.66667	2.4	#N/A	#N/A
rna96866	4.36194	0.0247812	XM_014176742.1	aminopeptidase N-like	0.166667	2.5	1.5	0.8	10.5	4.6	#N/A	#N/A
rna15692	-3.0021	0.0266782	NA	NA	7.16667	73	8.75	9	5	7.2	#N/A	#N/A
rna68041	3.72937	0.0274497	XM_014149593.1	calcium/calmodulin-dependent protein kinase type IV-like	3.16667	14.5	13.25	11.2	8.83333	4.8	#N/A	#N/A
rna5404	-1.37593	0.0277026	NM_001146673.1	Intracellular hyaluronan-binding protein 4	250.5	837.5	414.5	413.4	219.5	126.2	F	GO:0003730
rna77976	1.96248	0.027741	XM_014158923.1	G protein-coupled estrogen receptor 1	2.16667	7.25	11.25	7	12	7.4	#N/A	#N/A
rna5138	4.11823	0.0278106	XM_014132560.1	gelsolin-like	0.833333	3.25	2	2.4	32.6667	15.8	#N/A	#N/A
rna21147	-1.85162	0.0279284	NA	NA	9.66667	27	13.75	14.4	9.5	6.2	#N/A	#N/A
rna44060	-5.50696	0.0279284	XM_014126671.1	betabeta-carotene 1515'-monooxygenase-like	10	10.25	0.75	6.8	7.16667	10.4	#N/A	#N/A
rna83502	3.57496	0.0288015	XM_014164248.1	C-X-C chemokine receptor type 4-like	0.5	3.5	2.75	2.6	9.5	3.6	#N/A	#N/A
rna51808	0.909272	0.029854	XM_014134027.1	nck-associated protein 1-like	86	279	282.5	179.4	236.667	133.8	#N/A	#N/A
rna44995	4.88339	0.029854	XM_014127726.1	serine incorporator 4-like	2	3.5	3	1.6	2.16667	1.2	C	GO:0016021
rna6626	2.44461	0.0330054	XM_014146745.1	glutamate receptor ionotropic NMDA 3A-like	2.5	14.5	11.75	7.8	11	6.4	#N/A	#N/A
rna38642	2.46062	0.0335727	XM_014215796.1	guanine nucleotide-binding protein subunit beta-4	3.66667	13.25	15	8.8	23.1667	14.6	#N/A	#N/A
rna15198	3.08687	0.0335727	XM_014193877.1	potassium voltage-gated channel subfamily H member 6-like	0.333333	2	2.25	1.8	4.5	2	#N/A	#N/A
rna26904	5.855	0.0335727	NM_001140380.1	NF-kappa-B inhibitor epsilon	0.166667	0.5	0.75	0.4	6	4	#N/A	#N/A
rna15090	-1.50644	0.0353042	XM_014193676.1	myosin phosphatase Rho-interacting protein-like	27	47.75	38.75	43.8	36.8333	15	#N/A	#N/A
rna21868	3.65985	0.0356627	XM_014199873.1	dedicator of cytokinesis protein 2-like	0.833333	1.25	2.5	2.4	15.8333	4.2	#N/A	#N/A
rna59609	4.6271	0.0358111	XM_014142155.1	basic salivary proline-rich protein 4-like transcript variant X1	0.5	3.25	5.25	3	2.5	2	#N/A	#N/A
rna48439	3.00509	0.0358111	XM_014130879.1	uncharacterized LOC106564667	0.833333	1.75	2	2.4	6.16667	4	#N/A	#N/A
rna130043	-1.28458	0.0372967	XM_014189124.1	tyrosine-protein phosphatase non-receptor type 12-like	232.667	893.5	387.25	404.4	283.167	271	#N/A	#N/A
rna11038	2.39129	0.0381841	XM_014187528.1	macrophage mannose receptor 1-like	4.33333	13	9.25	9.4	37.1667	7.6	#N/A	#N/A
rna10762	-1.51658	0.0383339	XM_014185646.1	mitochondrial dynamics protein MID51-like	79.6667	450.5	166.75	124	138.5	77.8	#N/A	#N/A
rna52023	-1.81776	0.038356	XM_014134197.1	pancreatic progenitor cell differentiation and proliferation factor B-like	294.333	1174.25	384.5	481.4	318.333	227.2	#N/A	#N/A
rna83131	2.66509	0.0388281	XM_014163690.1	prolylcarboxypeptidase (angiotensinase C)	1.33333	4.5	2.75	3.6	6.66667	3	#N/A	#N/A
rna7879	4.63448	0.041294	XM_014159237.1	nucleotide-binding oligomerization domain-containing protein 1-like	17.8333	34.75	38.25	25.4	17.5	12.6	#N/A	#N/A
rna29446	3.0124	0.0417305	XM_014206991.1	dynein axonemal heavy chain 2	3.16667	7	5.5	13	7.33333	25	#N/A	#N/A
rna34935	-5.55206	0.0421168	XM_014212117.1	reticulon-4 receptor-like 2	1.5	35.25	29.5	36.8	26.6667	8.6	#N/A	#N/A
rna39117	4.91837	0.0442674	XM_014216213.1	Krueppel-like factor 2	0.333333	2.5	1	1	28	5.6	#N/A	#N/A
rna10862	-3.67589	0.0447382	XM_014186368.1	zinc finger protein 239-like transcript variant X1	2	7.5	4.75	2.8	1	1	#N/A	#N/A
rna54110	1.82493	0.0447382	NM_001139913.1	CCAAT/enhancer binding protein (C/EBP) beta	14	32.5	39	24.8	44.3333	34.6	#N/A	#N/A
rna77995	3.83884	0.045315	XM_014158911.1	histone H1.0-B-like	1	2.25	5.75	2.4	16.3333	4.8	#N/A	#N/A
gene49071	-2.26705	0.0464601	NA	NA	60.5	423.5	81.75	70	49.5	42	#N/A	#N/A
rna43736	1.22525	0.0475998	XM_014126507.1	integrin alpha FG-GAP repeat containing 1	31.1667	107	109	57.2	68.1667	36.8	#N/A	#N/A
rna96849	0.894901	0.0475998	XM_014176726.1	Golgi apparatus protein 1-like	72.5	177.25	198	159.4	178.167	114.6	#N/A	#N/A
rna59365	-1.47091	0.0475998	XM_014141287.1	cathepsin Z-like	213	1069.25	406.5	305.6	268.667	175.6	#N/A	#N/A
rna39867	-3.05719	0.0475998	NM_001141150.1	Dynein heavy chain	8.66667	20.5	12	8.2	11.3333	6.6	#N/A	#N/A
rna20752	-1.51842	0.0476289	XM_014198790.1	V-type proton ATPase subunit e 1-like	73.1667	301	132.25	142.6	79.1667	62.8	#N/A	#N/A
rna35121	1.31121	0.0478605	NM_001141552.2	PDZ domain containing 11	48	112.25	138.5	158.2	146.5	76.8	#N/A	#N/A
rna75501	-3.0588	0.0478605	XM_014156572.1	uncharacterized LOC106578024	2	7.75	4.75	1	1.83333	1.2	#N/A	#N/A
rna87648	1.88798	0.0480878	XM_014168000.1	integrin alpha-5-like	6.5	21	26.75	19.6	24	13.4	#N/A	#N/A
rna55909	5.40785	0.0480878	XM_014137531.1	moesin transcript variant X1	0	1	1.5	0.2	4.33333	2.6	#N/A	#N/A
rna68671	2.79264	0.0487762	XM_014149914.1	CD99 molecule transcript variant X6	0.666667	3.25	3.75	4	6	4	#N/A	#N/A
rna29940	1.25712	0.0489092	XM_014207424.1	histone deacetylase 8 transcript variant X2	12.1667	34.25	38	36.4	32.1667	19.8	#N/A	#N/A
rna44880	-1.81789	0.0498427	XM_014127608.1	alpha/beta hydrolase domain-containing protein 17C	266.833	1930	435.25	360.6	302.667	214.4	#N/A	#N/A
Poor 28 dpo versus good 14 dpo											#N/A	#N/A
rna67441	8.95587	4.13459e-05	XM_014148887.1	olfactomedin-4-like	0	0	0	0	48.1667	4.8	#N/A	#N/A
rna29072	5.55222	0.00012514	XM_014206628.1	ependymin-like	0.5	0.75	1.75	0.6	41.1667	4.8	#N/A	#N/A
rna131588	6.73165	0.000210406	XM_014183112.1	complement C1q subcomponent subunit C-like	0	0	0	0	10.3333	5	CCP	GO:0005576;GO:0005581;GO:0006958
rna92927	6.58375	0.000298437	NM_001165324.1	Integrin beta-2	0.666667	1.75	1	0.8	75.8333	17.4	CFPPP	GO:0008305;GO:0005044;GO:0006898;GO:0007160;GO:0007229
rna52980	6.67821	0.000325001	NM_001141727.1	Bactericidal permeability-increasing protein	0	0.75	0.25	0.6	60.8333	5.8	CF	GO:0005615;GO:0008289
rna22499	9.3622	0.000329915	NM_001140849.1	Hepcidin-1	10.8333	24.75	32.25	18.8	24.8333	23.2	CCFFFFPPPP	GO:0005576;GO:0005623;GO:0001530;GO:0005179;GO:0042834;GO:0070891;GO:0006879;GO:0008285;GO:0050829;GO:0050830
rna67038	5.96757	0.000329915	NA	NA	0.5	1	1.25	1.4	107.833	39	#N/A	#N/A
rna50638	8.71226	0.000579831	XM_014133066.1	H-2 class II histocompatibility antigen A-U alpha chain-like	0	0.5	0	0	43.8333	4.4	#N/A	#N/A
rna47370	8.75627	0.000936535	NM_001141779.1	complement component 1 q subcomponent C chain	0.166667	0.25	0	0	45.1667	4.2	CCP	GO:0005576;GO:0005581;GO:0006958
rna131586	6.9085	0.00150617	NM_001173900.1	complement component 1 q subcomponent B chain	0	0	0	0	12.8333	3.6	#N/A	#N/A
rna41593	8.22624	0.00151359	XM_014124361.1	olfactomedin-4-like	0	0	0	0	31.5	3.6	#N/A	#N/A
rna107188	5.8406	0.00176469	NM_001173900.1	complement component 1 q subcomponent B chain	0	0	0	0.2	17	6.8	#N/A	#N/A
rna35400	8.00029	0.00193603	XM_014212490.1	HLA class II histocompatibility antigen gamma chain-like	0	0.25	0.25	0	26.5	6.4	#N/A	#N/A
rna65579	8.72724	0.00361905	NM_001140215.1	Keratin type II cytoskeletal 8	0.166667	0	8.5	0	41.6667	6.2	CCCCFPP	GO:0005654;GO:0005737;GO:0016363;GO:0045095;GO:0005198;GO:0007601;GO:0050896
rna35429	8.08282	0.00401389	XM_014212572.1	dual specificity protein phosphatase 1-like	0.333333	0.25	0.75	0	28.6667	15.4	#N/A	#N/A
rna84457	6.75549	0.00415718	XM_014164761.1	macrophage receptor MARCO-like	0.5	0	0	0.4	28.1667	7.2	#N/A	#N/A
rna36163	6.69884	0.00501482	XM_014213290.1	neuroblast differentiation-associated protein AHNAK-like	0.333333	1	14.25	1.2	105.167	20	#N/A	#N/A
rna58915	6.41631	0.00726606	XM_014140845.1	uncharacterized LOC106569469	0	0.75	0.25	0.8	21.1667	6.4	#N/A	#N/A
rna28925	6.95445	0.00833889	NM_001165385.1	Macrosialin	0.166667	0	5.25	0.2	34.1667	15	C	GO:0016021
gene35807	-2.2376	0.00861996	NA	NA	51.8333	61.5	67.5	72	65.5	62.6	#N/A	#N/A
rna6471	7.75088	0.00861996	NA	NA	0.166667	0.25	0	0.2	24.5	28.6	#N/A	#N/A
rna80433	7.34912	0.00861996	XM_014161399.1	L-serine dehydratase/L-threonine deaminase-like	0	0	0.25	0.4	19.1667	24.8	CFFFFFFPPPP	GO:0005739;GO:0003941;GO:0004672;GO:0004794;GO:0005524;GO:0030170;GO:0042803;GO:0006094;GO:0006468;GO:0006565;GO:0042866
rna81434	7.65445	0.00861996	XM_014162065.1	tristetraprolin-like	0.166667	0	0.5	0.2	21.8333	14.6	#N/A	#N/A
rna8744	8.70512	0.00861996	NM_001123579.1	C type lectin receptor A	1	0	0.25	1.8	47.6667	49	#N/A	0
rna41984	6.05573	0.00878731	NA	NA	0	1.75	1.75	0.8	104.667	33.2	#N/A	#N/A
rna20337	5.21099	0.00976013	XM_014198502.1	dual specificity protein phosphatase 1-like	1.16667	3.75	1.75	1	34.5	3.4	CCFFFPPPPP	GO:0005634;GO:0005737;GO:0004725;GO:0016301;GO:0017017;GO:0000188;GO:0001706;GO:0016310;GO:0035335;GO:0042981
rna50637	6.04625	0.0160562	XM_014133067.1	H-2 class II histocompatibility antigen I-E beta chain	0.166667	0.5	1	0	44.3333	2.6	#N/A	#N/A
rna97644	-1.90055	0.0160562	XM_014177446.1	neuronal pentraxin-2-like	75.1667	150.25	108.5	170	64.1667	73	#N/A	#N/A
rna36617	7.32665	0.0165528	NM_001140451.1	Butyrate response factor 1	0	0.25	0.75	0.2	16.3333	15.8	CFFP	GO:0005829;GO:0003730;GO:0046872;GO:0061158
rna23614	5.15338	0.0176661	XM_014201580.1	apolipoprotein Eb-like	0.333333	0.75	3	1.2	49.8333	10.6	#N/A	#N/A
rna46884	5.3969	0.0240952	XM_014129493.1	cytokine receptor common subunit gamma-like	1.66667	2	1	1.8	48.6667	20.6	C	GO:0016021
rna55477	6.84454	0.0240952	NA	NA	0.166667	0	0.5	0	13.5	22	#N/A	#N/A
rna20213	6.64763	0.0240952	XM_014198390.1	Barrier-to-autointegration factor B transcript variant X1	0.166667	0.25	0.25	0	8.5	5.8	#N/A	#N/A
rna90692	6.94873	0.0243934	NM_001140576.1	Leukocyte surface antigen CD53	0.166667	1.25	0	0	14.1667	8.8	CP	GO:0005887;GO:0007166;
rna20438	3.84902	0.0282488	XM_014198569.1	neuroblast differentiation-associated protein AHNAK-like	5.33333	8.25	37.25	7.8	80.8333	18.2	#N/A	#N/A
rna34935	-6.37203	0.0307996	XM_014212117.1	reticulon-4 receptor-like 2	1.5	35.25	29.5	36.8	26.6667	8.6	#N/A	#N/A
rna93796	-0.967805	0.0412743	XM_014173824.1	dnaJ homolog subfamily C member 10-like	115.5	269.5	259.25	210.8	176	101.6	#N/A	#N/A
rna59668	5.9314	0.0434876	XM_014142102.1	protein S100-A1-like	0.166667	0	0.25	0.2	15.5	2	#N/A	#N/A
