# Supplementary material for: Postovulatory maternal transcriptome in Atlantic salmon and its relation to developmental potential of embryos
Source: BMC Genomics. 2019 Apr 24;20:315. doi: 10.1186/s12864-019-5667-4 (PMC6480738; doi:10.1186/s12864-019-5667-4)
Supplement: Supplementary file 7 — GO term enrichment. The number of total and differentially accumulated transcripts is shown for enriched GO terms. (XLSX 17 kb) [file 12864_2019_5667_MOESM7_ESM.xlsx]

## Sheet: Sheet2
Additional File 7: Enrichment of differentially accumulated transcripts in Gene Ontology terms
GO category	GO category	GO ID	GO Term name	Number of transcripts	Number of differentially expressed transcripts	Expected	P-value
	Cellular component	GO:0072562	blood microparticle	67	7	0.45	3.5e-07
	Cellular component	GO:0042613	MHC class II protein complex	13	3	0.09	8.3e-05
	Cellular component	GO:0002102	podosome	26	3	0.18	0.00071
	Cellular component	GO:0030315	T-tubule	34	3	0.23	0.00157
	Cellular component	GO:0042627	chylomicron	10	2	0.07	0.00198
	Cellular component	GO:0034385	triglyceride-rich plasma lipoprotein par...	11	2	0.07	0.00241
	Cellular component	GO:0043034	costamere	12	2	0.08	0.00288
	Cellular component	GO:0034364	high-density lipoprotein particle	13	2	0.09	0.00339
	Cellular component	GO:0005581	collagen trimer	91	4	0.62	0.00343
	Cellular component	GO:0070062	extracellular exosome	2838	31	19.25	0.00445
	Cellular component	GO:0017146	NMDA selective glutamate receptor comple...	17	2	0.12	0.00581
	Cellular component	GO:0045095	keratin filament	19	2	0.13	0.00724
	Cellular component	GO:0016021	integral component of membrane	7670	69	52.02	0.00218
	Biological process	GO:0072376	protein activation cascade	29	5	0.19	1.3e-06
	Biological process	GO:0002455	humoral immune response mediated by circ...	10	3	0.07	3.4e-05
	Biological process	GO:0033574	response to testosterone	16	3	0.11	0.00015
	Biological process	GO:0071801	regulation of podosome assembly	18	3	0.12	0.00022
	Biological process	GO:0061158	3'-UTR-mediated mRNA destabilization	19	3	0.13	0.00026
	Biological process	GO:0051447	negative regulation of meiotic cell cycl...	21	3	0.14	0.00036
	Biological process	GO:0070373	negative regulation of ERK1 and ERK2 cas...	52	4	0.35	0.00041
	Biological process	GO:0045600	positive regulation of fat cell differen...	63	4	0.42	0.00085
	Biological process	GO:0042742	defense response to bacterium	112	5	0.75	0.00095
	Biological process	GO:0030593	neutrophil chemotaxis	74	4	0.5	0.00155
	Biological process	GO:0043524	negative regulation of neuron apoptotic ...	127	5	0.85	0.00166
	Biological process	GO:0050766	positive regulation of phagocytosis	37	3	0.25	0.00194
	Biological process	GO:0010872	regulation of cholesterol esterification	10	2	0.07	0.00194
	Biological process	GO:0035970	peptidyl-threonine dephosphorylation	10	2	0.07	0.00194
	Biological process	GO:0007492	endoderm development	138	5	0.93	0.00239
	Biological process	GO:0045646	regulation of erythrocyte differentiatio...	42	3	0.28	0.00279
	Biological process	GO:0032355	response to estradiol	44	3	0.29	0.00319
	Biological process	GO:0003342	proepicardium development	13	2	0.09	0.00331
	Biological process	GO:0051665	membrane raft localization	13	2	0.09	0.00331
	Biological process	GO:0071850	mitotic cell cycle arrest	13	2	0.09	0.00331
	Biological process	GO:0086013	membrane repolarization during cardiac m...	13	2	0.09	0.00331
	Biological process	GO:0007229	integrin-mediated signaling pathway	150	5	1.01	0.00342
	Biological process	GO:0000160	phosphorelay signal transduction system	14	2	0.09	0.00385
	Biological process	GO:0030853	negative regulation of granulocyte diffe...	14	2	0.09	0.00385
	Biological process	GO:0033700	phospholipid efflux	14	2	0.09	0.00385
	Biological process	GO:0042159	lipoprotein catabolic process	14	2	0.09	0.00385
	Biological process	GO:0045059	positive thymic T cell selection	14	2	0.09	0.00385
	Biological process	GO:0060307	regulation of ventricular cardiac muscle...	14	2	0.09	0.00385
	Biological process	GO:0090266	regulation of mitotic cell cycle spindle...	14	2	0.09	0.00385
	Biological process	GO:0030223	neutrophil differentiation	15	2	0.1	0.00442
	Biological process	GO:0045940	positive regulation of steroid metabolic...	15	2	0.1	0.00442
	Biological process	GO:0034369	plasma lipoprotein particle remodeling	16	2	0.11	0.00503
	Biological process	GO:0043691	reverse cholesterol transport	16	2	0.11	0.00503
	Biological process	GO:0043113	receptor clustering	53	3	0.36	0.0054
	Biological process	GO:0001964	startle response	17	2	0.11	0.00568
	Biological process	GO:0034377	plasma lipoprotein particle assembly	17	2	0.11	0.00568
	Biological process	GO:0045060	negative thymic T cell selection	17	2	0.11	0.00568
	Biological process	GO:0043518	negative regulation of DNA damage respon...	18	2	0.12	0.00636
	Biological process	GO:0048920	posterior lateral line neuromast primord...	19	2	0.13	0.00708
	Biological process	GO:0001570	vasculogenesis	116	4	0.78	0.00775
	Biological process	GO:0032675	regulation of interleukin-6 production	61	3	0.41	0.00798
	Biological process	GO:0019882	antigen processing and presentation	159	5	1.07	0.00438
	Biological process	GO:0006929	substrate-dependent cell migration	21	2	0.14	0.00862
	Biological process	GO:0031579	membrane raft organization	21	2	0.14	0.00862
	Biological process	GO:1901385	regulation of voltage-gated calcium chan...	21	2	0.14	0.00862
	Biological process	GO:0036003	positive regulation of transcription fro...	22	2	0.15	0.00944
	Biological process	GO:0051591	response to cAMP	66	3	0.44	0.00991
	Molecular function	GO:0044548	S100 protein binding	14	3	0.09	9.3e-05
	Molecular function	GO:0003730	mRNA 3'-UTR binding	50	4	0.33	0.00031
	Molecular function	GO:0005044	scavenger receptor activity	68	4	0.44	0.00101
	Molecular function	GO:0001540	amyloid-beta binding	36	3	0.23	0.00164
	Molecular function	GO:0000155	phosphorelay sensor kinase activity	12	2	0.08	0.00266
	Molecular function	GO:0017127	cholesterol transporter activity	13	2	0.08	0.00313
	Molecular function	GO:0004972	NMDA glutamate receptor activity	15	2	0.1	0.00417
	Molecular function	GO:0008330	protein tyrosine/threonine phosphatase a...	16	2	0.1	0.00475
	Molecular function	GO:0001530	lipopolysaccharide binding	20	2	0.13	0.00739
	Molecular function	GO:0050750	low-density lipoprotein particle recepto...	21	2	0.14	0.00814
	Molecular function	GO:0015485	cholesterol binding	22	2	0.14	0.00891
	Molecular function	GO:0004896	cytokine receptor activity	75	3	0.49	0.01294
	Molecular function	GO:0008236	serine-type peptidase activity	162	5	1.05	0.00419
